# Supplementary material
Source: PubMed Central journal article supplement (PMC3325492)
Supplement: NIHMS367566-supplement-1_si_001.pdf [file NIHMS367566-supplement-1_si_001.pdf]

# Stereoselectivities of Histidine-Catalyzed Asymmetric Aldol Additions and Contrasts with Proline Catalysis: A Quantum Mechanical Analysis

Yu-hong Lam, K. N. Houk, Ulf Scheffler and Rainer Mahrwald

*Department of Chemistry, University of California, Los Angeles, California 90095-1569 and*

*Institute of Chemistry, Humboldt-University, Brook-Taylor Str. 2, 12489 Berlin, Germany*

## Experimental Procedures and Characterization of the Products

The aldehydes were freshly distilled before use. Ethyl glyoxylate **1c** (50% in toluene - FLUKA), 2,2-dimethoxy-acetaldehyde **1b** (60% aqueous solution - FLUKA) and chloroacetaldehyde **1a** (50% aqueous solution - FLUKA) were used as purchased. Aldehyde **1d**, protected lactaldehyde **1f** and glyceraldehyde **1g** were prepared by procedures from literature.

<sup>1</sup>H-NMR spectra were recorded at 500 or 300 MHz and <sup>13</sup>C-NMR spectra were recorded at 75 or 125 MHz in CDCl<sub>3</sub> (unless stated otherwise), respectively, using an AC-300 or a BRUKER AV500 spectrometer. Chemical shifts are given in ppm, and coupling constants are given in Hz. High-resolution mass spectrometry was performed on an LTQ-FT-ICR machine (Finnigan). Optical rotation values were measured with a JASCO DIP-370 polarimeter. Angles of rotations refer to the enantiomeric excess. Purification of products was accomplished by flash chromatography (Merck silica gel 60, particle size 0.04 -0.063 mm). Thin layer chromatography was performed with Merck Silica Gel 60 F<sub>254</sub> TLC plates.

A varying mixture of aldol adducts **2d** and **2e** and their corresponding acetals was observed.<sup>1</sup> In order to obtain defined reaction products, the reaction mixtures were treated with ethylene glycol to yield the corresponding 1,3-dioxolanes. No racemization was observed in this process – the enantioselectivities of the 1,3-dioxolane products were found to be the same as those found in the corresponding aldol adducts **2d** and **2e** isolated. The formation of acetals in these reactions is

consistent with reported observations in chiral imidazolidinones-catalyzed aldol additions<sup>2</sup> and tertiary amine-catalyzed aldol additions.<sup>3</sup>

#### General aldol-procedure A

##### Isolation of aldehydes **2d** and **2e** as their corresponding 1,3-dioxolanes

In a typical experiment, 78 mg L-histidine (0.5 mmol) was added to a mixture of isobutyraldehyde (10 mmol) and 5 mmol of aldehydes **1d** or **1e** and 200 mg water. The reaction mixture was stirred vigorously at room temperature and monitored by TLC. After completion of the reaction (5-7 days) the mixture was quenched with acetone, dried (MgSO<sub>4</sub>) and filtered. The filtrate was removed in vacuo. The remaining residue was dissolved in 1.0 ml glycol and 5 ml THF. 0.5 mmol of toluenesulfonic acid was then added. The reaction was monitored by TLC (~ 12 h, room temperature). After completion of the reaction, the mixture was neutralized, filtered, absorbed to Celite<sup>®</sup> and purified by column chromatography (hexane / acetone 19/1 - 4/1).

#### General aldol-procedure B

78 mg L-histidine was added to a mixture of isobutyraldehyde (5.5 mmol), 5 mmol of aldehydes **1f**<sup>4</sup> or **1g**<sup>5</sup> and 200 mg water. The reaction mixture was stirred vigorously at room temperature and monitored by TLC. After completion of the reaction (12 h-2 days), the mixture was quenched with acetone, dried (MgSO<sub>4</sub>) and filtered. The filtrate was absorbed to Celite<sup>®</sup>, evaporated in vacuo, and the remaining residue was purified by column chromatography.

##### (R)-4-Chloro-3-hydroxy -2,2-dimethylbutanal (**2a**)

78 mg L-histidine (0.5 mmol) was added to a mixture of isobutyraldehyde (5.5 mmol) and 5 mmol of chloroacetaldehyde **1a**. The reaction mixture was stirred vigorously at room temperature and monitored by TLC. After completion of the reaction (20 h), the mixture was quenched with acetone, dried (MgSO<sub>4</sub>) and filtrated. The filtrate was absorbed to Celite<sup>®</sup>, evaporated in vacuo, and the remaining residue was purified by column chromatography.

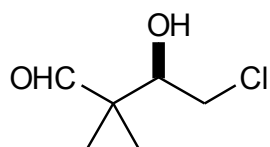

**<sup>1</sup>H-NMR** (CDCl<sub>3</sub>, 300 MHz):  $\delta$  = 1.15 (s, 3H), 1.16 (s, 3H), 3.49 (dd, 1H,  $J$  = 9.6, 11.4), 3.71 (dd, 1H,  $J$  = 2.4, 11.4), 3.97 (dd, 1H,  $J$  = 2.2, 9.6), 9.57 (s, 1H).

**<sup>13</sup>C-NMR** (75 MHz):  $\delta$  = 17.1, 19.1, 46.9, 49.6, 75.3, 204.7.

**HRMS**(ESI): calc. for C<sub>12</sub>H<sub>22</sub>Cl<sub>2</sub>O<sub>4</sub> + Na<sup>+</sup>: 323.0787 found: 323.0787

$[\alpha] = -12.2^\circ$  (c = 1, CHCl<sub>3</sub>)

(R)-3-hydroxy-4,4-dimethoxy-2,2-dimethylbutanal (**2b**)

78 mg L-histidine (0.5 mmol) was added to a mixture of isobutyraldehyde (5.5 mmol) and 5 mmol of dimethoxyacetaldehyde **1b** and 200 mg water. The reaction mixture was stirred vigorously at room temperature and monitored by TLC. After completion of the reaction (20 h), the mixture was quenched with acetone, dried (MgSO<sub>4</sub>) and filtrated. The filtrate was absorbed to Celite<sup>®</sup>, evaporated in vacuo, and the remaining residue was purified by column chromatography.

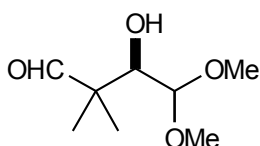

**<sup>1</sup>H-NMR** (CDCl<sub>3</sub>, 300 MHz):  $\delta$  = 1.05 (s, 3H), 1.08 (s, 3H), 3.33 (s, 3H), 3.41 (s, 3H), 3.68 (1H, d,  $J$  = 6.2), 4.18 (1H, d,  $J$  = 6.2), 9.42 (s, 1H).

**<sup>13</sup>C-NMR** (75 MHz):  $\delta$  = 16.6, 19.5, 48.4, 54.9, 55.8, 74.2, 104.8, 203.1.

**HRMS** (ESI):

calc. for C<sub>14</sub>H<sub>28</sub>O<sub>8</sub> + NH<sub>4</sub><sup>+</sup>: 342.2122 found: 342.2129 2[M – CH<sub>2</sub>] + NH<sub>4</sub><sup>+</sup>

calc. for C<sub>14</sub>H<sub>28</sub>O<sub>8</sub> + Na<sup>+</sup>: 347.1676 found: 347.1683 2[M – CH<sub>2</sub>] + Na<sup>+</sup>

calc. for C<sub>14</sub>H<sub>28</sub>O<sub>8</sub> + K<sup>+</sup>: 363.1416 found: 363.1423 2[M – CH<sub>2</sub>] + K<sup>+</sup>

**EIMS**: calc. for C<sub>7</sub>H<sub>13</sub>O<sub>4</sub><sup>+</sup>: 161.081 found: 161.088 [M – CH<sub>3</sub>]<sup>+</sup>

calc. for C<sub>7</sub>H<sub>13</sub>O<sub>3</sub><sup>+</sup>: 145.086 found: 145.097 [M – OCH<sub>3</sub>]<sup>+</sup>

$[\alpha] = +5.3^\circ$  (c = 1, CHCl<sub>3</sub>)

2(R)-Hydroxy-3,3-dimethyl-4-oxo-butxyric acid ethyl ester (2c)<sup>6</sup>

155 mg L-histidine (1.0 mmol) was added to a mixture of ethyl glyoxylate **1c** (10 mmol, 50% in toluene), 11 mmol of isobutyraldehyde and 1.0 ml glycol. The reaction mixture was stirred vigorously at room temperature and monitored by TLC. After completion of the reaction (12 h), the mixture was quenched with acetone, dried (MgSO<sub>4</sub>) and filtered. The filtrate was evaporated in vacuo with toluene (3 times), absorbed to Celite<sup>®</sup> and the remaining residue was purified by column chromatography.

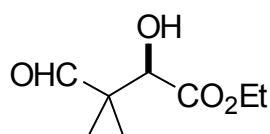

**<sup>1</sup>H-NMR** (CDCl<sub>3</sub>, 300 MHz):  $\delta$  = 1.06 (s, 3H), 1.14 (s, 3H), 1.27 (t, 3H,  $J$  = 7.2), 4.25 (m, 2H), 4.32 (s, 1H), 9.57 (s, 1H).

**<sup>13</sup>C-NMR** (75 MHz):  $\delta$  = 14.1, 16.9, 18.2, 50.4, 62.3, 73.5, 172.8, 202.5.

**HRMS**(ESI): calc. for C<sub>8</sub>H<sub>14</sub>O<sub>4</sub> + H<sup>+</sup>: 175.0965 found: 175.0963

calc. for C<sub>16</sub>H<sub>28</sub>O<sub>8</sub> + NH<sub>4</sub><sup>+</sup>: 366.2122 found: 366.2122

$[\alpha] = -15.4^\circ$  (c = 1, CHCl<sub>3</sub>)

(R)-1-Benzylthio-3-(1,3-dioxolan-2-yl)-3-methylbutan-2-ol

general procedure **A**

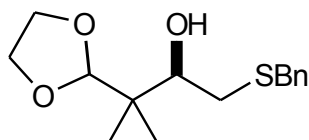

**<sup>1</sup>H-NMR** (CDCl<sub>3</sub>, 300 MHz):  $\delta$  = 0.84 (s, 3H), 0.92 (s, 3H), 2.43 (dd, 1H,  $J$  = 8.8, 13.6), 2.60 (dd, 1H,  $J$  = 1.2, 13.7), 3.71 (dd, 1H,  $J$  = 1.3, 8.7), 3.72-3.79 (m, 2H), 3.81-3.98 (m, 4H), 4.69 (s, 1H), 7.23-7.36 (m, 5H).

**<sup>13</sup>C-NMR** (75 MHz):  $\delta$  = 16.9, 19.1, 33.8, 35.9, 41.0, 64.9, 65.1, 73.7, 108.6, 127.0, 128.4, 129.0, 138.2.

**HRMS** (ESI): calc. for C<sub>15</sub>H<sub>22</sub>O<sub>3</sub>S + NH<sub>4</sub><sup>+</sup>: 300.1628 found: 300.1626

calc. for C<sub>15</sub>H<sub>22</sub>O<sub>3</sub>S + Na<sup>+</sup>: 305.1182 found: 305.1182

calc. for C<sub>15</sub>H<sub>22</sub>O<sub>3</sub>S + K<sup>+</sup>: 321.0921    found: 321.0921

[α] = -45.9° (c = 1, CHCl<sub>3</sub>)

(S)-2-(1,3-dioxolan-2-yl)-2,5-dimethylhexan-3-ol

general procedure **A**

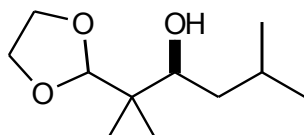

<sup>1</sup>H-NMR (CDCl<sub>3</sub>, 300 MHz): δ = 0.85 (s, 3H), 0.88 (d, 3H, J = 6.6), 0.91 (s, 3H), 0.92 (d, 3H, J = 6.5), 1.11 (ddd, 1H, J = 1.8, 10.3, 13.7), 1.35 (ddd, 1H, J = 3.6, 10.9, 13.6), 1.84 (ddsept, 1H, J = 3.5, 6.6, 10.2), 3.63 (dd, 1H, J = 1.9, 10.8), 3.81-3.99 (m, 4H), 4.65 (s, 1H).

<sup>13</sup>C-NMR (75 MHz): δ = 16.5, 20.2, 21.2, 24.2, 24.4, 40.1, 40.6, 64.8, 65.1, 73.3, 110.0.

HRMS (ESI): calc. for C<sub>11</sub>H<sub>22</sub>O<sub>3</sub>+ NH<sub>4</sub><sup>+</sup>: 220.1907    found: 220.1907

calc. for C<sub>11</sub>H<sub>22</sub>O<sub>3</sub>+ Na<sup>+</sup>: 225.1461    found: 225.1462

calc. for C<sub>22</sub>H<sub>44</sub>O<sub>6</sub>+ H<sup>+</sup>: 405.3211    found: 405.3212

calc. for C<sub>22</sub>H<sub>44</sub>O<sub>6</sub>+ Na<sup>+</sup>: 427.3030    found: 427.3030

[α] = -31.6° (c = 1, CHCl<sub>3</sub>)

3,4(R,R)-4-Benzoyloxy-3-hydroxy-2,2-dimethyl-pentanal **2f**

general aldol-procedure **B**

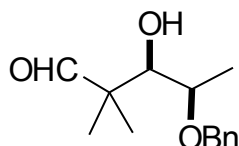

<sup>1</sup>H-NMR (CDCl<sub>3</sub>, 300 MHz): δ = 1.05 (s, 3H), 1.15 (s, 3H), 1.28 (d, 3H, J = 6.2 Hz), 3.39 (d, 1H, J = 2.0 Hz), 3.69 (dq, 1H, J = 2.0, 6.2 Hz), 4.33 (d, 1H, J = 11.1 Hz), 4.56 (d, 1H, J = 11.1 Hz), 7.27-7.37 (m, 5H), 9.62 (s, 1H).

<sup>13</sup>C-NMR (75 MHz):  $\delta$  = 16.4, 18.9, 20.3, 49.2, 70.4, 72.5, 81.1, 127.9, 128.2, 128.4, 137.4, 205.3.

**HRMS** (ESI): calc. for C<sub>14</sub>H<sub>20</sub>O<sub>3</sub> + NH<sub>4</sub><sup>+</sup>: 254.1751    found: 254.1752  
                  calc. for C<sub>14</sub>H<sub>20</sub>O<sub>3</sub> + Na<sup>+</sup>: 259.1305    found: 259.1306  
                  calc. for C<sub>14</sub>H<sub>20</sub>O<sub>3</sub> + K<sup>+</sup>: 275.1044    found: 275.1044

$[\alpha] = -34.0^\circ$  (c = 1, CHCl<sub>3</sub>)

3,4-(*R,R*)-3-[2,2-Dimethyl-(1,3)dioxolan-4-yl]-3-hydroxy-2,2-dimethyl-propionaldehyde

**2g**

general aldol-procedure **B**

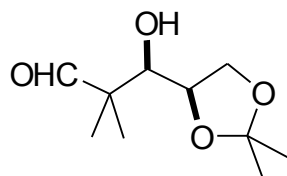

<sup>1</sup>H-NMR (CDCl<sub>3</sub>, 300 MHz):  $\delta$  = 1.09 (s, 3H), 1.11(s, 3H), 1.32 (s, 3H), 1.38 (s, 3H), 2.62 (d, 1H, *J* = 7.6, OH), 3.54 (dd, 1H, *J* = 2.6, 7.6), 3.81 (dd, 1H, *J* = 7.0, 8.1), 4.01 (dd, 1H, *J* = 7.0, 8.1), 4.19 (ddd, 1H, *J* = 2.6, 7.0, 7.0), 9.59 (s, 1H).

<sup>13</sup>C-NMR (75 MHz):  $\delta$  = 18.2, 19.5, 25.3, 26.1, 49.6, 66.8, 74.3, 74.8, 109.6, 205.6.

**HRMS**(ESI): calc. for C<sub>10</sub>H<sub>18</sub>O<sub>4</sub>+ NH<sub>4</sub><sup>+</sup>: 220.1543    found: 220.1543  
                  calc. for C<sub>10</sub>H<sub>18</sub>O<sub>4</sub>+ Na<sup>+</sup>: 225.1097    found: 225.1097  
                  calc. for C<sub>20</sub>H<sub>36</sub>O<sub>8</sub>+ Na<sup>+</sup>: 427.2302    found: 427.2304

$[\alpha] = +0.5^\circ$  (c = 1, CHCl<sub>3</sub>)

### **Proof of configuration**

The absolute and relative configurations of the aldol adducts were determined by single-crystal X-ray analysis and NMR correlations.<sup>1</sup>

The **relative configuration** was determined by analysis of the vicinal <sup>1</sup>H-coupling constants and comparison with literature.

To determine the **absolute configuration**, the (*R*)- and (*S*)-Mosher esters were prepared and the anisotropic <sup>1</sup>H chemical shifts were used to establish the absolute configuration of the hydroxyl stereocenter.<sup>7</sup>

### Determination of enantiomeric excess

The aldol adducts were converted into the corresponding (S)-MTPA-esters as follows:

1.0 ml (0.01 mmol) of a CH<sub>2</sub>Cl<sub>2</sub>-solution of (R)-MTPA-Cl (0.01 mol / l) was added to a solution of the corresponding aldol adduct (0.01 mmol) and a catalytic amount of DMAP in 1.0 ml abs. CH<sub>2</sub>Cl<sub>2</sub>. After 10 h at r.t., the reaction mixture was diluted with diethyl ether and extracted with aq. NH<sub>4</sub>Cl-solution. The organic layer was separated, dried (Na<sub>2</sub>SO<sub>4</sub>), and filtered. The filtrate was evaporated in vacuo. The remaining crude residue was used for <sup>1</sup>H-NMR experiments.

The enantiomeric excess of the products was determined by integration of corresponding signals in the <sup>1</sup>H NMR spectra.

### Proof of absolute configuration

The calculated differences of chemical shifts in the <sup>1</sup>H NMR spectra of corresponding Mosher esters indicate the assigned configuration of aldol-products.

The indicated chemical shift differences ( $\Delta\delta(S-R)$ , ppb) established the absolute stereochemistry at the C3 for aldol adducts (stereogenic center formed by aldol addition).

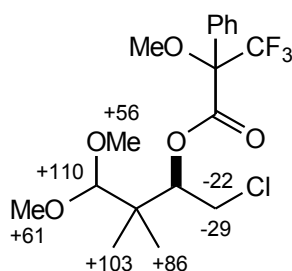

(S)-Mosher-ester of **2a** (dimethylacetal): <sup>1</sup>H-NMR (CDCl<sub>3</sub>, 300 MHz):  $\delta$  = 0.94 (s, 3H), 0.97 (s, 3H), 3.51 (m, 3H), 3.52 (s, 3H), 3.53 (s, 3H), 3.59 (dd, 1H,  $J$  = 9.8, 12.3), 3.88 (s, 1H), 3.93 (dd, 1H,  $J$  = 2.3, 12.3), 5.46 (dd, 1H,  $J$  = 2.3, 9.8), 7.38-7.71 (m, 5H).

(R)-Mosher-ester of **2a** (dimethylacetal): <sup>1</sup>H-NMR (CDCl<sub>3</sub>, 300 MHz):  $\delta$  = 0.87 (s, 3H), 0.87 (s, 3H), 3.40 (s, 3H), 3.41 (s, 3H), 3.62 (dd, 1H,  $J$  = 9.4, 12.3), 3.63 (m, 3H), 3.77 (s, 1H), 3.96 (dd, 1H,  $J$  = 2.1, 12.3), 5.44 (dd, 1H,  $J$  = 2.1, 9.4), 7.39-7.71 (m, 5H).

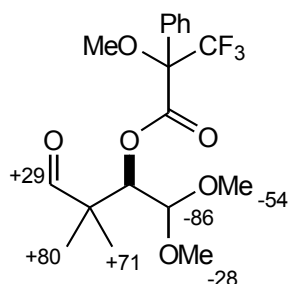

(S)-Mosher-ester of **2b**:  $^1\text{H-NMR}$  ( $\text{CDCl}_3$ , 300 MHz):  $\delta$  = 1.04 (s, 3H), 1.10 (s, 3H), 3.27 (s, 3H), 3.33 (s, 3H), 3.51 (m, 3H), 4.32 (d, 1H,  $J$  = 6.8), 5.42 (d, 1H,  $J$  = 6.8), 7.44-7.39 (m, 3H), 7.54-7.59 (m, 2H), 9.44 (s, 1H).

(R)-Mosher-ester of **2b**:  $^1\text{H-NMR}$  ( $\text{CDCl}_3$ , 300 MHz):  $\delta$  = 0.97 (s, 3H), 1.02 (s, 3H), 3.32 (s, 3H), 3.36 (s, 3H), 3.59 (m, 3H), 4.40 (d, 1H,  $J$  = 6.8), 5.46 (d, 1H,  $J$  = 6.8), 7.44-7.39 (m, 3H), 7.54-7.59 (m, 2H), 9.41 (s, 1H).

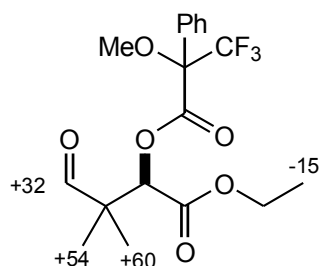

(S)-Mosher-ester of **2c**:  $^1\text{H-NMR}$  ( $\text{CDCl}_3$ , 300 MHz):  $\delta$  = 1.14 (s, 3H), 1.17 (s, 3H), 1.27 (t, 3H,  $J$  = 7.2), 3.51 (q, 3H,  $J$  = 1.0), 4.20-4.29 (m, 2H), 5.33 (s, 1H), 7.38-7.66 (m, 5H), 9.51 (s, 1H).

(R)-Mosher-ester of **2c**:  $^1\text{H-NMR}$  ( $\text{CDCl}_3$ , 300 MHz):  $\delta$  = 1.09 (s, 3H), 1.11 (s, 3H), 1.28 (t, 3H,  $J$  = 7.2), 3.62 (q, 3H,  $J$  = 1.2), 4.20-4.29 (m, 2H), 5.31 (s, 1H), 7.38-7.66 (m, 5H), 9.58 (s, 1H).

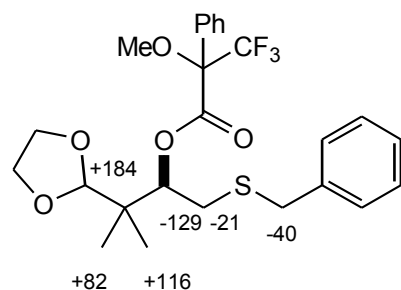

(S)-Mosher-ester of **2d**:  $^1\text{H-NMR}$  ( $\text{CDCl}_3$ , 500 MHz):  $\delta$  = 0.90 (s, 3H), 0.93 (s, 3H), 2.48 (dd, 1H,  $J$  = 10.6, 14.6), 2.78 (dd, 1H,  $J$  = 2.4, 14.6), 3.53 (m, 3H), 3.73 (m, 2H),



3.74-3.94 (m, 4H), 3.56 (m, 3H), 4.55 (s, 1H), 5.41 (dd, 1H,  $J = 2.4, 10.5$ ), 7.23-7.71 (m, 10H).

(R)-Mosher-ester of **2d**:  $^1\text{H-NMR}$  ( $\text{CDCl}_3$ , 500 MHz):  $\delta = 0.81$  (s, 3H), 0.82 (s, 3H), 2.50 (dd, 1H,  $J = 10.6, 14.6$ ), 2.81 (dd, 1H,  $J = 2.3, 14.6$ ), 3.63 (m, 3H), 3.77 (m, 2H), 3.78-3.95 (m, 4H), 3.63 (m, 3H), 4.36 (s, 1H), 5.39 (dd, 1H,  $J = 2.3, 10.5$ ), 7.23-7.71 (m, 10H).

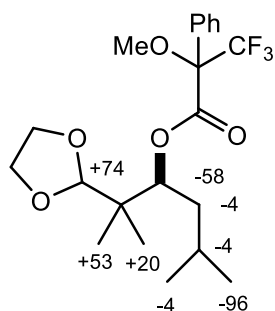

(S)-Mosher-ester of **2e**:  $^1\text{H-NMR}$  ( $\text{CDCl}_3$ , 500 MHz):  $\delta = 0.81$  (d, 3H,  $J = 6.3$ ), 0.89 (s, 3H), 0.93 (s, 3H), 0.94 (d, 3H,  $J = 6.7$ ), 1.13 (ddd, 1H,  $J = 1.8, 10.4, 13.6$ ), 1.52 (m, 1H), 1.86 (m, 1H), 3.52 (m, 3H), 3.74-3.99 (m, 4H), 4.51 (s, 1H), 5.30 (dd, 1H,  $J = 1.6, 10.6$ ), 7.31-7.71 (m, 5H).

(R)-Mosher-ester of **2e**:  $^1\text{H-NMR}$  ( $\text{CDCl}_3$ , 500 MHz):  $\delta = 0.87$  (s, 3H), 0.87 (s, 3H), 0.90 (d, 3H,  $J = 6.4$ ), 0.94 (d, 3H,  $J = 6.3$ ), 1.13 (ddd, 1H,  $J = 1.8, 10.1, 13.6$ ), 1.58 (m, 1H), 1.86 (m, 1H), 3.57 (m, 3H), 3.74-4.01 (m, 4H), 4.44 (s, 1H), 5.31 (dd, 1H,  $J = 1.5, 10.3$ ), 7.34-7.73 (m, 5H).

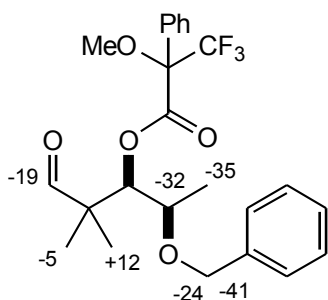

(S)-Mosher-ester of **2f**:  $^1\text{H-NMR}$  ( $\text{CDCl}_3$ , 300 MHz):  $\delta = 0.96$  (s, 3H), 1.05 (s, 3H), 1.07 (d, 3H,  $J = 6.4$ ), 3.49 (m, 3H), 3.80 (dq, 1H,  $J = 2.1, 6.4$ ), 4.29 (d, 1H,  $J = 11.7$ ), 4.46 (d, 1H,  $J = 11.7$ ), 5.15 (d, 1H, 2.1), 7.20-7.68 (m, 10H), 9.57 (s, 1H).

(R)-Mosher-ester of **2f**:  $^1\text{H-NMR}$  ( $\text{CDCl}_3$ , 300 MHz):  $\delta = 0.94$  (s, 3H), 1.06 (s, 3H), 1.11 (d, 3H,  $J = 6.4$ ), 3.60 (m, 3H), 3.82 (dq, 1H,  $J = 2.0, 6.4$ ), 4.32 (d, 1H,  $J = 11.5$ ), 4.49 (d, 1H, 11.5), 5.15 (d, 1H, 2.0), 7.23-7.68 (m, 10H), 9.59 (s, 1H).

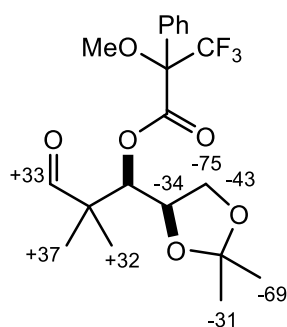

(S)-Mosher-ester of **2g**:  $^1\text{H-NMR}$  ( $\text{CDCl}_3$ , 300 MHz):  $\delta$  = 1.06 (s, 3H), 1.19 (s, 3H), 1.26 (s, 3H), 1.27 (s, 3H), 3.50 (m, 3H), 3.54 (dd, 1H,  $J$  = 6.8, 8.5), 3.94 (dd, 1H,  $J$  = 6.8, 8.5), 4.34 (ddd, 1H,  $J$  = 3.6, 6.8, 6.8), 5.27 (d, 1H,  $J$  = 3.4), 7.37-7.45 (m, 3H), 7.53-7.60 (m, 2H), 9.57 (s, 1H).

(R)-Mosher-ester of **2g**:  $^1\text{H-NMR}$  ( $\text{CDCl}_3$ , 300 MHz):  $\delta$  = 1.02 (s, 3H), 1.15 (s, 3H), 1.30 (s, 3H), 1.34 (s, 3H), 3.58 (m, 3H), 3.61 (dd, 1H,  $J$  = 6.6, 8.7), 3.99 (dd, 1H,  $J$  = 6.6, 8.7), 4.37 (ddd, 1H,  $J$  = 4.0, 6.6, 6.6), 5.32 (d, 1H,  $J$  = 4.0), 7.36-7.47 (m, 3H), 7.61-7.68 (m, 2H), 9.54 (s, 1H).

## References

- 1 See also Markert, M.; Scheffler, U.; Mahrwald, R. *J. Am. Chem. Soc.* **2009**, *131*, 16642–16643.
- 2 Mangion, I. K.; Northrup, A. B.; MacMillan, D. W. C. *Angew. Chem. Int. Ed.* **2004**, *43*, 6722–6724.
- 3 Córdova, A. *Tetrahedron Lett.* **2004**, *45*, 3949–3952.
- 4 Hoppe, D.; Tarara, G.; Wilckens, M. *Synthesis* **1989**, 83–88.
- 5 Schmid, C. R.; Bryant, J. D.; Dowlatzedah, M.; Philips, J. L.; Prather, D. E.; Schantz, R. D.; Sear, N. L.; Vianco, C. S. *J. Org. Chem.* **1991**, *56*, 4056–4058.
- 6 Schreiber, J.; Wermuth, C. G. *Bull. Soc. Chim. Fr.* **1965**, 2242–2249.
- 7 a) Ohtani, I.; Kusumi, T.; Kashman, Y.; Kakisawa, H. *J. Am. Chem. Soc.* **1991**, *113*, 4092–4096. b) Seco, J. M.; Quinoa, E.; Giguera, R. *Chem. Rev.* **2004**, *104*, 17–118. c) Freire, F.; Seco, J. M.; Quinoa, E.; Riguera, R. *J. Org. Chem.* **2005**, *70*, 3778–3790.

## Computational Section

Full citation for ref. 54 in main text

M. J. Frisch, G. W. Trucks, H. B. Schlegel, G. E. Scuseria, M. A. Robb, J. R. Cheeseman, G. Scalmani, V. Barone, B. Mennucci, G. A. Petersson, H. Nakatsuji, M. Caricato, X. Li, H. P. Hratchian, A. F. Izmaylov, J. Bloino, G. Zheng, J. L. Sonnenberg, M. Hada, M. Ehara, K. Toyota, R. Fukuda, J. Hasegawa, M. Ishida, T. Nakajima, Y. Honda, O. Kitao, H. Nakai, T. Vreven, J. A. Montgomery, Jr., J. E. Peralta, F. Ogliaro, M. Bearpark, J. J. Heyd, E. Brothers, K. N. Kudin, V. N. Staroverov, R. Kobayashi, J. Normand, K. Raghavachari, A. Rendell, J. C. Burant, S. S. Iyengar, J. Tomasi, M. Cossi, N. Rega, J. M. Millam, M. Klene, J. E. Knox, J. B. Cross, V. Bakken, C. Adamo, J. Jaramillo, R. Gomperts, R. E. Stratmann, O. Yazyev, A. J. Austin, R. Cammi, C. Pomelli, J. W. Ochterski, R. L. Martin, K. Morokuma, V. G. Zakrzewski, G. A. Voth, P. Salvador, J. J. Dannenberg, S. Dapprich, A. D. Daniels, O. Farkas, J. B. Foresman, J. V. Ortiz, J. Cioslowski, and D. J. Fox, Gaussian, Inc., Wallingford CT, 2009.

TS-4a

SCF Energy= -819.047712337  
Zero-point correction (ZPE)= -818.76625  
Internal Energy (U)= -818.74905  
Enthalpy (H)= -818.74811  
Gibbs Free Energy (G)= -818.81130  
H, 0.5831741328, -0.081529716, 1.3110493499  
C, 2.1380974516, -1.6872162092, 1.2596995791  
O, 0.9056924217, -1.5912279701, 1.1646216853  
C, 3.1030540201, -1.2208550657, -0.9853961957  
C, 2.4363310215, -0.0463973199, -0.8441347374  
N, 1.1026519704, 0.126196588, -1.1082974542  
C, 0.4149858366, 1.3622587605, -0.8174408761  
C, -1.0489367004, 1.2742380975, -1.3012357115  
C, 0.3959254525, 1.7913071208, 0.6551206725  
O, 0.5090499023, 0.8884279, 1.6091590556  
O, 0.2362241054, 2.9699428152, 0.9433938092  
H, 0.9034719885, 2.1872793051, -1.3456074889  
H, -1.5366918504, 2.2289550102, -1.0891155947  
H, -1.0347631198, 1.1343530696, -2.3859776751  
H, 0.5219817272, -0.7038834595, -1.1904709755  
C, -1.7939059983, 0.1582791649, -0.6399697543  
C, -2.5956228916, 0.2196506273, 0.4714941986  
N, -1.6614654289, -1.1566755862, -1.0495392695  
H, -2.9288682686, 1.0501352349, 1.075623335

C, -2.3674285081, -1.8659268687, -0.1894690187  
H, -2.4926070594, -2.9390793416, -0.2019431871  
N, -2.9499440326, -1.0785792858, 0.7427135003  
H, 2.954842737, 0.8419342507, -0.4841355829  
H, 2.6395900128, -2.6364333998, 1.0373476673  
H, 2.7321118889, -0.8972965557, 1.7375726952  
H, -3.5507672468, -1.3938944839, 1.4940137636  
C, 2.4486866248, -2.4254992311, -1.6129846055  
H, 1.4227679058, -2.5849954511, -1.2582646258  
H, 2.4026244849, -2.3215294291, -2.7047552072  
H, 3.0188288706, -3.3325104056, -1.3904938663  
C, 4.5768262893, -1.2972335141, -0.6989922765  
H, 4.791503766, -2.0689047039, 0.0524415869  
H, 5.1380521062, -1.5693140671, -1.6014332058  
H, 4.963532078, -0.3430636706, -0.32934077

TS-4b

SCF Energy= -819.035508621  
Zero-point correction (ZPE)= -818.75478  
Internal Energy (U)= -818.73769  
Enthalpy (H)= -818.73675  
Gibbs Free Energy (G)= -818.80076  
C, -2.8266452244, -1.9298065033, 0.7848869052  
C, -2.0724783277, -0.8253365015, 1.0941384746  
N, -0.8607082589, -0.5092717032, 0.6037344751  
C, -0.19627952, 0.7566852611, 0.8384354623  
C, -0.1433885187, 1.6465966612, -0.4185233089  
O, 0.8172371007, 2.3789237193, -0.6249065117  
O, -1.163407765, 1.6417654927, -1.2442263856  
H, -0.3060334976, -1.2104788429, 0.1187675224  
H, -2.057286722, 1.1326081173, -0.9857317523  
C, -3.4465371543, -0.6301196044, -0.9275315557  
O, -3.3711269857, 0.6307950824, -0.8262521604  
H, -4.4302241863, -1.1063250124, -0.8466652259  
H, -2.5234003594, -0.0518722476, 1.7147850714  
H, -2.6740279308, -1.160336288, -1.4993183664  
C, 1.2047088368, 0.5482726231, 1.4306116055  
H, 1.0793350111, -0.0124702107, 2.3626210969  
H, 1.6290712746, 1.5212184852, 1.6873709873  
C, 2.1474694112, -0.1670077856, 0.5118512452  
C, 3.3733671981, 0.2581498631, 0.0702654798  
N, 1.8649897104, -1.4102454275, -0.0278179457  
H, 3.9317460359, 1.1628217508, 0.2569092932  
C, 2.9074566652, -1.7167000852, -0.7775266637  
H, 3.0312865566, -2.6220109903, -1.354461801  
N, 3.8433654026, -0.7427346958, -0.7452493124  
H, 4.728005198, -0.7526598536, -1.2374962346

H, -0.8010400286, 1.3197917894, 1.5599960745  
C, -2.2967912065, -3.0919305033, -0.0074404712  
H, -1.3881599367, -2.8555241025, -0.5689437226  
H, -2.074936654, -3.9377689258, 0.6539517576  
H, -3.0543475997, -3.4330725711, -0.7254807379  
C, -4.1030718584, -2.1786807938, 1.5441600146  
H, -4.8847579986, -2.5525366979, 0.8716231931  
H, -3.9563384291, -2.9404871526, 2.3195835045  
H, -4.4706238188, -1.2674345061, 2.0256681129

TS-4c

SCF Energy= -819.034121014  
Zero-point correction (ZPE)= -818.75316  
Internal Energy (U)= -818.73621  
Enthalpy (H)= -818.73527  
Gibbs Free Energy (G)= -818.79814  
H, 2.456074209, 1.0850159721, 0.0853370316  
C, 1.6106963146, -2.4369677146, 0.3779080564  
C, 0.8250294229, -1.316588065, 0.2605732966  
N, 0.5910359843, -0.5944967363, -0.8503629958  
C, 0.04789388, 0.7564232998, -0.8940606974  
C, -0.5685299287, 1.2309508706, 0.4242774703  
C, 1.107185733, 1.7857094531, -1.3142210286  
O, 2.2631019667, 1.7934674822, -0.7008916031  
O, 0.8466666467, 2.6072513493, -2.1878410931  
H, -0.7155513597, 0.7885252956, -1.6770344831  
H, 0.186911412, 1.2286969058, 1.2192604868  
H, 0.9071916923, -0.9573557256, -1.7430940869  
H, 0.4098209692, -0.9053236122, 1.1765223018  
C, 3.1917108074, -0.9004962303, 0.6754226233  
O, 2.8964072978, 0.2600600405, 1.1018457351  
H, 3.6494864772, -1.6109904331, 1.3718113706  
H, 3.4144070207, -1.0244819253, -0.3921139368  
C, -1.7654142945, 0.4380473767, 0.8506859375  
C, -2.5236399898, -0.4468281653, 0.1269688137  
N, -2.2707427082, 0.5541696943, 2.1295427259  
H, -2.4550858737, -0.80768588, -0.8879026927  
C, -3.3198354628, -0.2451918789, 2.1672349253  
H, -4.2470636231, -1.5327770039, 0.774274807  
H, -3.9658279423, -0.4049871177, 3.0180670516  
N, -3.512076752, -0.8687887157, 0.9843201374  
H, -0.8564027366, 2.278647268, 0.2767200127  
C, 1.588682965, -3.1982218521, 1.6775989786  
H, 2.5915491486, -3.5656128264, 1.925332507  
H, 1.2361619454, -2.5725564624, 2.5033601335  
H, 0.9334020139, -4.0747750004, 1.6067522978  
C, 2.2122499617, -3.1599849395, -0.7934909441

H, 1.6307507256, -4.0590151166, -1.0290198804  
H, 2.2716053512, -2.5489539516, -1.6983172462  
H, 3.2297615265, -3.4876697952, -0.5446143121

TS-4d

SCF Energy= -819.042615508  
Zero-point correction (ZPE)= -818.76195  
Internal Energy (U)= -818.74439  
Enthalpy (H)= -818.74345  
Gibbs Free Energy (G)= -818.80850  
C, 1.7236050558, -2.1674216738, 1.0241257174  
C, 1.2203838478, -0.9070148298, 0.9105596168  
N, 0.6693676734, -0.3979419716, -0.2274911819  
C, 0.1138295066, 0.9354356464, -0.2910018759  
C, 1.1882831689, 2.0266632227, -0.2072420676  
O, 0.8999193882, 3.1744479514, 0.0967574063  
O, 2.4335721712, 1.7222589245, -0.5242955972  
H, 0.3900049668, -1.0401595959, -0.956506773  
H, 2.6306238146, 0.753550722, -0.7608234602  
C, 3.655524654, -1.1207383813, 0.0908889109  
O, 3.3551078785, -0.6245949429, -1.0114729713  
H, 3.8279739094, -0.4835800289, 0.9682959787  
H, 1.3258439908, -0.2012306618, 1.7341253748  
H, 4.0058242386, -2.1583084044, 0.1521294029  
C, -1.0094105851, 1.1963377309, 0.7325724471  
H, -0.595714567, 1.1624482299, 1.7456264951  
H, -1.3920013859, 2.2056579199, 0.5671405292  
C, -2.1160259989, 0.1965849554, 0.6128664748  
C, -3.1233007335, 0.161391458, -0.3197829795  
N, -2.2317606726, -0.8852414898, 1.4641853609  
H, -3.3741032283, 0.8208337768, -1.1368498425  
C, -3.2900951666, -1.5535541833, 1.0460760773  
H, -3.6853265285, -2.4585949193, 1.4839647396  
N, -3.8594453222, -0.9609402826, -0.0280160889  
H, -4.6882187667, -1.2815937673, -0.5131624942  
H, -0.3092811316, 1.0482224695, -1.2961963793  
C, 2.2782408385, -2.6496149438, 2.334925327  
H, 3.2848016574, -3.0673586764, 2.202095597  
H, 2.3342991614, -1.841719861, 3.0701699439  
H, 1.6551754374, -3.4504763746, 2.75132437  
C, 1.5250137408, -3.1796631989, -0.0733435185  
H, 0.4948401886, -3.5589786598, -0.0820943504  
H, 1.7295598307, -2.7565822851, -1.0647967034  
H, 2.1916019674, -4.035434875, 0.0689675514

TS-4e

SCF Energy= -819.048552975

Zero-point correction (ZPE)= -818.76649  
Internal Energy (U)= -818.74935  
Enthalpy (H)= -818.74840  
Gibbs Free Energy (G)= -818.81128  
C, -2.0933976589, 2.0961386098, -0.4238064398  
O, -1.2193505225, 2.3074408593, 0.4329764754  
C, -2.9888079816, -0.1020776733, -0.0319151665  
C, -1.823440141, -0.5163343833, -0.6048119737  
N, -0.6386502809, -0.7180861395, 0.0336907924  
C, 0.5091580449, -1.2454077009, -0.6800328452  
C, 1.2021685445, -0.1719560973, -1.5498485374  
C, 1.533487632, -1.8470235741, 0.3001711709  
O, 1.338246447, -1.6900601978, 1.5339659306  
O, 2.5146060197, -2.4354128115, -0.2278838295  
H, 0.189330539, -2.0496480267, -1.3542135717  
H, 1.8995654589, -0.6645542065, -2.2308118157  
H, -0.6096779606, -0.8149438579, 1.0417157192  
H, -1.7876839836, -0.6718736275, -1.6829054123  
H, -3.1439844847, 2.3214252114, -0.204735194  
H, -1.8263505845, 1.9330832486, -1.4761095246  
C, 1.9643039668, 0.8205102294, -0.7403965303  
C, 2.2941361235, 2.502496284, 0.6597190072  
H, 0.3268122675, 1.9926793519, 0.0949268866  
H, 2.1219800504, 3.3383223833, 1.3203976982  
N, 1.3640516061, 1.816949137, 0.0060123593  
O, 0.4417630198, 0.3348308493, -2.1539739546  
N, 3.4801641977, 1.9785548434, 0.3592224774  
C, 3.3062375901, 0.9247231811, -0.5114105685  
H, 4.1356339769, 0.3505563407, -0.8925066192  
H, 4.3656108264, 2.316571269, 0.7222142227  
C, -4.2496984492, -0.0477575938, -0.8510511194  
H, -4.9482433384, -0.8383367578, -0.5490771382  
H, -4.774510058, 0.9059623933, -0.7095502798  
H, -4.0417661936, -0.1712233887, -1.9182644406  
C, -3.1225510082, 0.0539039956, 1.4575281551  
H, -2.1931234668, 0.4017959075, 1.9221933547  
H, -3.908016283, 0.7792121135, 1.697289866  
H, -3.3982223957, -0.8961685711, 1.9331409254

TS-4f  
SCF Energy= -819.042637745  
Zero-point correction (ZPE)= -818.76019  
Internal Energy (U)= -818.74337  
Enthalpy (H)= -818.74243  
Gibbs Free Energy (G)= -818.80449  
C, -4.391393791, 0.3858561983, 1.8532475586  
O, -3.6564034324, -0.1969436626, 2.6930092386

C, -4.1308733269, 2.5778759884, 1.4885705115  
C, -2.7753316539, 2.3661979517, 1.4270507371  
N, -2.0515387987, 2.0236779314, 0.3456120649  
C, -0.6098048933, 1.840684348, 0.3907043953  
C, -0.1859452336, 0.6432715702, 1.2644298232  
C, -0.0591357521, 1.6760503053, -1.0415427261  
O, 1.1874200108, 1.5242872457, -1.1328613991  
O, -0.8765175469, 1.7013899998, -1.9984252707  
H, -0.1344876648, 2.7346119282, 0.8140469603  
H, 0.9037611569, 0.6409355142, 1.3332300908  
H, -2.4495450703, 2.0791556853, -0.5859157644  
H, -2.2079297631, 2.4044203847, 2.3567953656  
H, -4.212409679, 0.2284905798, 0.7776294145  
H, -5.4057289069, 0.6855816532, 2.1457871573  
C, -0.648401855, -0.6661313753, 0.7189944098  
C, -2.0060676257, -2.3907213727, 0.4434785351  
H, -2.5155597182, -0.8583249945, 1.8296849053  
H, -2.8400360378, -3.0688462655, 0.5414256693  
N, -1.8287104428, -1.2619577496, 1.1180711049  
H, -0.5806835532, 0.7739089919, 2.2768410669  
N, -0.9708893993, -2.5450394776, -0.3800177918  
C, -0.1047366858, -1.4841809383, -0.2306149172  
H, 0.8100038486, -1.4065737747, -0.7965111758  
H, -0.8481564494, -3.3316065943, -1.0092970492  
C, -4.9848907835, 2.6522531474, 0.2530325628  
H, -5.1006305946, 3.6900393105, -0.0827816725  
H, -5.9900183527, 2.2663627608, 0.4652248367  
H, -4.5780884336, 2.073482951, -0.5822261242  
C, -4.7197351686, 3.1602680354, 2.7476831064  
H, -4.0752832137, 2.9776728565, 3.6133888437  
H, -5.7053775012, 2.7258971234, 2.9551922516  
H, -4.8619261083, 4.2441982939, 2.654097711

TS-4g  
SCF Energy= -819.044220046  
Zero-point correction (ZPE)= -818.76247  
Internal Energy (U)= -818.74505  
Enthalpy (H)= -818.74411  
Gibbs Free Energy (G)= -818.80818  
C, 1.0147864891, -2.6172444133, 0.7091193438  
O, 0.1732242573, -2.7315800876, -0.1997503137  
C, 2.5733694173, -0.9164022643, 0.1334340408  
C, 1.5132588804, -0.0850122052, 0.3377906857  
N, 0.5709700254, 0.2389730435, -0.5966965169  
C, -0.3869426003, 1.3053804269, -0.3485712629  
C, -1.376853668, 0.93700216, 0.7751760285  
C, 0.2428819393, 2.6969339104, -0.0583928906

O, 1.4904972251, 2.7981181747, 0.0462343592  
O, -0.585634034, 3.6455712654, 0.0356356754  
H, -0.9598204121, 1.4321653333, -1.2722735007  
H, -1.9114933082, 1.8384858221, 1.0794955963  
H, 0.8393484334, 0.1208560144, -1.5659336637  
H, 1.343942253, 0.3220555623, 1.3322637026  
H, 1.9510800122, -3.1869919618, 0.6645249381  
H, 0.7423182768, -2.1824446119, 1.6803567067  
C, -2.4008424732, -0.0640651568, 0.3615764267  
C, -3.2408224822, -1.9996309735, -0.3097207508  
H, -1.166604382, -1.8313158265, -0.0328520951  
H, -3.3252393351, -3.0281572001, -0.6253335526  
N, -2.1156772783, -1.3710822875, 0.0111348014  
H, -0.8280045424, 0.5708286169, 1.6501612487  
N, -4.246815478, -1.1384923598, -0.1786290621  
C, -3.7528598648, 0.0777237901, 0.2396571235  
H, -4.3922102174, 0.9276495406, 0.4172092877  
H, -5.221407314, -1.3553472843, -0.3606824587  
C, 2.9025872589, -1.4375707718, -1.2397188739  
H, 3.3758711696, -0.6652812672, -1.859808329  
H, 3.5993103063, -2.2790456807, -1.1724208771  
H, 2.0073395915, -1.7845737329, -1.7706070471  
C, 3.5917796958, -1.112847257, 1.2231902493  
H, 3.2487736459, -0.6917674973, 2.1730762572  
H, 3.8108255906, -2.1775365195, 1.3768602402  
H, 4.5415906822, -0.6300107419, 0.961870963

#### TS-4h

SCF Energy= -819.038731864  
Zero-point correction (ZPE)= -818.75630  
Internal Energy (U)= -818.73925  
Enthalpy (H)= -818.73831  
Gibbs Free Energy (G)= -818.80151  
C, -2.1329578373, 1.6084065808, -0.4086485691  
O, -1.6589312712, 2.2049590435, 0.5946866936  
C, -2.8399086207, -0.4859893474, -0.1497108407  
C, -1.6293193479, -0.7640967374, 0.433163835  
N, -0.4931214834, -1.149172231, -0.1899391566  
C, 0.6881695027, -1.5455621409, 0.5600217146  
C, 1.2623500381, -0.3969907118, 1.4159057364  
C, 0.4682478157, -2.7961967752, 1.4544432835  
O, -0.689169623, -3.2736133527, 1.557639951  
O, 1.5065510572, -3.242531702, 2.0167450686  
H, 1.4468946788, -1.8221866969, -0.1774005651  
H, 2.1116043702, -0.7926421224, 1.9754596492  
H, -0.5756420041, -1.542564023, -1.119726284  
H, -1.5215284703, -0.5738482312, 1.499645093

H, -1.4565499191, 1.2636424532, -1.2067626477  
H, -3.1750001324, 1.7963028493, -0.6990639688  
C, 1.7348462152, 0.7625714142, 0.6051850977  
C, 1.6269600165, 2.6825964702, -0.4891627684  
H, -0.0992552851, 1.9687451536, 0.499412584  
H, 1.2615583622, 3.6079563334, -0.9075833088  
N, 0.9309952306, 1.8307580227, 0.2537532514  
H, 0.5197618662, -0.0578084258, 2.1455641938  
N, 2.8615843955, 2.2015917365, -0.6223670269  
C, 2.9594744239, 1.0048960662, 0.0519596384  
H, 3.8746011586, 0.4353934955, 0.0858423772  
H, 3.6054043716, 2.6602876721, -1.1383902951  
C, -3.1134216489, -0.7878569447, -1.5975821116  
H, -3.4992302746, -1.8067324218, -1.7248197022  
H, -3.8726096938, -0.1004032568, -1.9888639514  
H, -2.220993179, -0.6874158543, -2.2248272073  
C, -4.0383293555, -0.2646515605, 0.7372427255  
H, -3.739138179, 0.0478757898, 1.7426802152  
H, -4.6983287773, 0.5051520769, 0.3193728843  
H, -4.6335221103, -1.1814275618, 0.8310306157

#### TS-5a

SCF Energy= -1317.92345660  
Zero-point correction (ZPE)= -1317.62139  
Internal Energy (U)= -1317.60191  
Enthalpy (H)= -1317.60097  
Gibbs Free Energy (G)= -1317.67034  
C, -1.0530887984, -1.6423935222, -0.5673784983  
C, -2.1909824786, -1.8707770254, 0.160983444  
C, -3.497005582, -2.1119124375, -0.5466357606  
O, 3.7040551831, -1.8087520503, -0.8116662835  
C, -2.2738132323, 0.4217953761, 0.6253051751  
O, -1.3020584425, 0.6889337107, 1.3563301838  
H, -1.1291466828, -1.4801534365, -1.6429464184  
H, 1.2822003144, -2.1065797842, -1.7609013199  
H, 2.268110347, -0.0230261756, -2.308821182  
H, -4.2952485739, -1.4796516148, -0.1337153722  
H, -3.422088007, -1.9136473685, -1.6198811768  
H, -3.819864403, -3.1521570873, -0.4161779812  
N, 0.1971638808, -1.5364750589, -0.066053837  
C, 1.5125264546, 0.0087439871, -1.5204652766  
C, 1.364407346, -1.4063378648, -0.9216337725  
C, 2.640373223, -1.7722692508, -0.1382614469  
O, 2.5351573192, -1.980754404, 1.0985346643  
H, 0.3925195994, -1.7978162826, 0.8942866623  
H, 0.562648488, 0.2981195918, -1.9817136461  
C, 1.940319382, 1.0248997445, -0.5175700871

C, 3.1402976724, 1.6593152902, -0.3735479362  
N, 1.1438679102, 1.4631428417, 0.524996886  
H, 4.0404910957, 1.6091456553, -0.9651345778  
C, 1.8235436397, 2.3251867967, 1.2717539153  
H, 0.1653138727, 1.1512044783, 0.7388993128  
H, 3.7611449536, 3.0669213475, 1.1128622817  
H, 1.4584291279, 2.8308415788, 2.1526503371  
N, 3.0370489483, 2.4597908567, 0.742956395  
C, -2.1211575511, -2.2726314728, 1.6102517257  
H, -1.3513700774, -1.7232436549, 2.1621179044  
H, -3.0822494408, -2.0898037078, 2.1030425455  
H, -1.9027071485, -3.3440391887, 1.7059451136  
C, -2.361339722, 0.9853596123, -0.7727016588  
H, -1.3735054429, 1.0922827108, -1.2205060607  
H, -3.0370049391, 0.4231867339, -1.4147663569  
H, -3.223512227, 0.0975510917, 1.0741436899  
Cl, -3.0553870088, 2.6593809833, -0.633542587

TS-5b

SCF Energy= -1317.91954313  
Zero-point correction (ZPE)= -1317.61742  
Internal Energy (U)= -1317.59814  
Enthalpy (H)= -1317.59719  
Gibbs Free Energy (G)= -1317.66631  
C, -0.6742349203, -1.8136382179, -0.4802295425  
C, -1.8571835233, -1.9040537203, -0.2211512081  
C, -3.0144397632, -2.627927668, -0.4213752301  
O, 4.0630464132, -1.6190027772, -0.5106250811  
C, -1.96169236, 0.3856617426, -0.2434031921  
O, -1.3033792343, 0.9077043841, 0.6895369849  
H, -0.6724761368, -1.9986715281, -1.5544427934  
H, 1.7225721468, -2.159994624, -1.5164683574  
H, 2.5755295385, -0.0825692613, -2.2909238425  
H, -3.9743523519, -2.2786935734, -0.0286618869  
H, -3.0163182586, -2.5081188589, -1.5095399768  
H, -2.9575169746, -3.702115182, -0.201896641  
N, 0.5177076536, -1.480685286, 0.0370134353  
C, 1.7844572179, -0.0153846693, -1.5404775265  
C, 1.7159428494, -1.3562890085, -0.7733171511  
C, 2.971649268, -1.499896301, 0.1062121995  
O, 2.8226191115, -1.4458297197, 1.3547864183  
H, 0.6411841281, -1.3648480737, 1.0376676484  
H, 0.8333790065, 0.1377427308, -2.0619712396  
C, 2.0829592184, 1.1404880728, -0.6487851801  
C, 3.2427018671, 1.8384279453, -0.4689111005  
N, 1.1680318009, 1.6617008629, 0.2459654253  
H, 4.2013455438, 1.7547673805, -0.9557904417

C, 1.7393705437, 2.6382398006, 0.9398339452  
H, 0.1637043687, 1.325309204, 0.3902836698  
H, 3.6602443713, 3.4402032431, 0.8855580202  
H, 1.2689656366, 3.2310735074, 1.709253958  
N, 2.9976951337, 2.763230926, 0.5221793166  
C, -1.8430248369, -1.8342463999, 1.7222953637  
H, -1.2327371931, -1.0017375584, 2.0893853699  
H, -2.8573930375, -1.7095697603, 2.1142040646  
H, -1.43449946, -2.7596444028, 2.1499259708  
C, -3.4660965966, 0.3638340275, -0.1769766248  
H, -3.8316261712, 0.1097612014, 0.8185215611  
H, -3.906659381, -0.2671396426, -0.944185127  
Cl, -4.0454797988, 2.0527627449, -0.5300570698  
H, -1.5403418199, 0.3502904591, -1.2571845549

TS-5c

SCF Energy= -1317.92128210  
Zero-point correction (ZPE)= -1317.61962  
Internal Energy (U)= -1317.60008  
Enthalpy (H)= -1317.59914  
Gibbs Free Energy (G)= -1317.66904  
H, 0.0194111822, -0.9708309753, -0.5418570132  
C, 2.0804974386, 0.2057326319, -0.9943277048  
O, 0.9352908382, 0.0038313401, -1.4271176104  
C, 1.8399588915, 1.9676214318, 0.6892598421  
C, 1.0355524804, 1.061286724, 1.3139067892  
N, -0.2657628825, 0.827336788, 0.9937037428  
C, -1.0735062561, -0.1739185325, 1.6468926884  
C, -2.5643108646, 0.2227029331, 1.5888486608  
C, -0.9602646777, -1.5900652676, 1.0690063625  
O, -0.4153297006, -1.7765955693, -0.1172966052  
O, -1.4232626746, -2.5377904608, 1.6877054169  
H, -0.7702683951, -0.2541654412, 2.6957212848  
H, -3.1371303997, -0.5002168081, 2.1739782935  
H, -2.6682577379, 1.2034947843, 2.0621982532  
H, -0.7115153488, 1.3675666539, 0.257982809  
C, -3.0783433306, 0.2514374708, 0.1840084803  
C, -3.8549701478, -0.6863145482, -0.4475337464  
N, -2.7298501136, 1.2492065477, -0.7090256523  
H, -4.3142761236, -1.5974735476, -0.0952110517  
C, -3.2941372084, 0.9104760255, -1.852991146  
H, -3.2383993166, 1.4661761464, -2.7778406742  
N, -3.9823837571, -0.2479364692, -1.7423605705  
H, 1.4299563182, 0.4337657475, 2.1123158882  
H, 2.7034176763, 0.9951150802, -1.4375319023  
H, -4.5056599942, -0.7006336901, -2.4817960871  
C, 1.2861938047, 2.9495093227, -0.3096569376

H, 0.5449931075, 2.4993722287, -0.9799403471  
H, 0.8013827996, 3.7913554687, 0.2014267767  
H, 2.0901262387, 3.358956715, -0.9295751061  
C, 3.2399325607, 2.2119839544, 1.1795848797  
H, 3.9646449765, 2.1105941449, 0.3601725103  
H, 3.3410561871, 3.2337832052, 1.5660264592  
H, 3.5216544284, 1.5171151999, 1.9763424297  
C, 2.8011401048, -0.8187631855, -0.1529060904  
H, 3.5949289528, -0.3758189552, 0.4453051366  
H, 2.1160633741, -1.4066701414, 0.4567781797  
Cl, 3.6025125691, -1.9686059525, -1.3089096384

TS-5d

SCF Energy= -1317.91804624  
Zero-point correction (ZPE)= -1317.61680  
Internal Energy (U)= -1317.59744  
Enthalpy (H)= -1317.59649  
Gibbs Free Energy (G)= -1317.66596  
H, -0.2402297049, -0.5089243962, 1.0356061324  
C, 1.8034025066, -0.5017285668, 0.2035591416  
O, 0.6524336972, -0.9557809887, -0.013705106  
N, 1.843881499, 1.6693423677, -0.7716168288  
C, 0.765380825, 1.8938619575, 0.0476366064  
N, -0.5026671569, 1.5426983057, -0.2424957839  
C, -1.5977286445, 1.6727742393, 0.6973941296  
C, -2.9299896824, 1.347508586, -0.0098725262  
C, -1.4979040181, 0.7848031884, 1.9426372856  
O, -0.7474357112, -0.2901233699, 1.9220462388  
O, -2.1572278354, 1.073535752, 2.9345144411  
H, -1.6380044265, 2.700518373, 1.0714470355  
H, -3.7406541661, 1.498597757, 0.7066112488  
H, -3.0623775842, 2.0617860528, -0.8277662184  
H, -0.68809613, 1.0174094693, -1.0935769143  
C, -2.9536867456, -0.0547765396, -0.5287290272  
C, -3.475961932, -1.1704731641, 0.074432255  
N, -2.3139181404, -0.4121982943, -1.7018047683  
H, -4.031093832, -1.3022432244, 0.9910552224  
C, -2.4500301727, -1.7214526194, -1.7921529048  
H, -2.0762161837, -2.3468939958, -2.5899476254  
N, -3.145592169, -2.2207355503, -0.74540214  
H, 0.9072702441, 2.3488285453, 1.0280377884  
H, -3.3888179272, -3.1936413644, -0.6051096063  
C, 1.6310033797, 1.2625280376, -2.2080343112  
H, 0.9478571471, 0.4100479077, -2.3092356059  
H, 1.2047312919, 2.0937757277, -2.785070278  
H, 2.580082366, 0.9880009981, -2.6774860815  
C, 3.1548684897, 2.3221347674, -0.4156043652

H, 4.0134592995, 1.7051702987, -0.6982600657  
H, 3.2654241627, 3.2722482308, -0.9542742323  
H, 3.2187116602, 2.5326973325, 0.6560603673  
C, 2.9437678712, -0.9827286527, -0.6530746052  
H, 2.6165508997, -1.1945413567, -1.6699007418  
H, 3.8078296062, -0.3239809224, -0.6330040967  
Cl, 3.4949794677, -2.5592357139, 0.0589267513  
H, 2.0683477494, -0.1114381749, 1.194007189

Table 2 Entry 2 Type a TS

SCF Energy= -1087.32302281  
Zero-point correction (ZPE)= -1086.94458  
Internal Energy (U)= -1086.92151  
Enthalpy (H)= -1086.92057  
Gibbs Free Energy (G)= -1086.99661  
C, 0.7033650202, -0.8975679015, -2.018386112  
C, 0.0017062407, 0.4697494636, -2.1485922196  
C, 2.1750435412, -0.7709003252, -2.460086866  
C, 0.7380627481, 1.5723202186, -1.4665433372  
H, -0.0688143642, 0.7227490671, -3.208625829  
H, -1.0140037613, 0.3803417494, -1.7539101046  
N, 0.63605946, -1.4460036686, -0.6727105887  
H, 0.2083635706, -1.5837338954, -2.7151436444  
O, 2.3594182839, -0.4083414979, -3.6516964948  
O, 3.0703982911, -1.0096162694, -1.6078861595  
N, 0.9137269564, 1.6618534729, -0.0982888978  
C, 1.4172938173, 2.6260682257, -2.0078545865  
C, -0.4886427195, -1.9685026349, -0.1511672922  
H, 1.5359089578, -1.6301468108, -0.2413188985  
C, 1.6589881239, 2.7221625543, 0.18587234  
H, 0.5350388514, 1.0020223887, 0.6238485522  
N, 1.9748551132, 3.3237647178, -0.9595542327  
H, 1.5471085511, 2.9271627804, -3.0352189078  
C, -0.5694262834, -2.619916494, 1.0569496958  
H, -1.393247011, -1.7987675116, -0.7361292381  
H, 1.9568699529, 3.0437490437, 1.172048119  
H, 2.5367485384, 4.1653123301, -1.0333236861  
C, -1.8434576088, -3.3291424076, 1.434371295  
C, 0.681621223, -3.0675534812, 1.7702790333  
H, -1.7013640421, -4.41621393, 1.3972409552  
H, -2.147637531, -3.0835875643, 2.4614523512  
H, -2.667891833, -3.0753276143, 0.7618542304  
H, 0.4498931221, -3.3475996766, 2.8032902957  
H, 1.1138997875, -3.9478509948, 1.2777121113  
H, 1.4507878929, -2.2889257719, 1.8012229914  
O, -1.7939699364, 0.729186704, 0.5255335517  
C, -2.0654394049, -0.0873396694, 1.6194466096



C, -2.9640875136, 1.2107977678, -0.1266484848  
C, -0.7344673356, -0.6446088251, 2.1224088689  
O, -2.7054505509, 0.6140553916, 2.6699604914  
H, -2.7706019822, -0.884538107, 1.3583523017  
H, -3.5800464802, 1.8009067315, 0.5592310545  
H, -3.5529505002, 0.3737601102, -0.5216722258  
H, -2.6298348102, 1.8469515676, -0.9481384149  
O, 0.3281821293, -0.0083161563, 1.9444817651  
H, -0.8370076569, -1.3090504788, 2.9936746007  
C, -1.9936075771, 1.7521224226, 3.1602345429  
H, -1.6801614934, 2.4030904836, 2.3380775665  
H, -1.1170294616, 1.4501520769, 3.743128436  
H, -2.6870932157, 2.2913974184, 3.8063494619

Table 2 Entry 2 Type b TS

SCF Energy= -1087.31692447  
Zero-point correction (ZPE)= -1086.93873  
Internal Energy (U)= -1086.91600  
Enthalpy (H)= -1086.91505  
Gibbs Free Energy (G)= -1086.99041  
C, 2.1360343534, -1.4966089077, -0.6730236282  
C, 2.1789628796, -0.244686098, -1.5798869655  
C, 3.3881531348, -1.5139373853, 0.2229785577  
C, 2.4443652901, 1.0082858391, -0.8172884792  
H, 2.9788738999, -0.373361004, -2.312647184  
H, 1.2299165252, -0.1718890309, -2.1221927932  
N, 0.9347754346, -1.5561996291, 0.1417460817  
H, 2.1631785016, -2.3770564066, -1.3226695233  
O, 4.4845801653, -1.6928860284, -0.3692565278  
O, 3.2298025794, -1.3062066013, 1.4542844551  
N, 1.5179700801, 1.6030287691, 0.0180088889  
C, 3.5893787903, 1.7451485286, -0.7176971729  
C, -0.2530390052, -1.9276419, -0.3493621082  
H, 1.0441894817, -1.3130075075, 1.1216985042  
C, 2.0709005616, 2.659444343, 0.6010911047  
H, 0.5075227154, 1.2690951253, 0.1936406662  
N, 3.3270592298, 2.7650563495, 0.1693524176  
H, 4.5497510673, 1.6270814528, -1.1939141152  
C, -1.4454816384, -1.9125850918, 0.3492798758  
H, -0.2446349581, -2.2315132197, -1.3961588119  
H, 1.5908680991, 3.3220428332, 1.3049037654  
H, 3.9764827699, 3.4902421125, 0.4549128686  
C, -1.4102829045, -1.7026151655, 1.8384820299  
C, -2.6069901508, -2.6997063194, -0.206019695  
H, -0.9527844001, -0.7409548221, 2.1008423278  
H, -0.8234318987, -2.4919517379, 2.327582725  
H, -2.4189516144, -1.725145046, 2.2579227606

H, -3.563454851, -2.283995738, 0.1284758346  
H, -2.5681611585, -3.7352505082, 0.1559090222  
H, -2.5971173246, -2.727460363, -1.3004334506  
C, -1.5330611487, 0.2260227553, -0.4047383788  
C, -3.0514108797, 0.2943481527, -0.5112704785  
O, -0.9332354758, 0.8863081489, 0.4888491946  
H, -1.0566548625, 0.0859262313, -1.3857586691  
O, -3.4143318086, 1.4394425614, -1.2622642829  
C, -3.5957028865, 0.3033112055, 0.7708115969  
H, -3.4420544893, -0.5360430071, -1.1072985316  
C, -3.0849349629, 2.7014243314, -0.6801272702  
C, -5.0206862767, 0.3044351846, 0.7712730401  
H, -3.3993298527, 2.7483333396, 0.3666963504  
H, -2.0116349313, 2.9034840076, -0.7501510862  
H, -3.6311014419, 3.4505372887, -1.2547726241  
H, -5.4131504503, 1.2652381093, 0.4220318671  
H, -5.405974186, -0.4992277272, 0.1320206047  
H, -5.335565052, 0.1354245255, 1.8014764368

Table 2 Entry 2 Type c TS

SCF Energy= -1087.31991088  
Zero-point correction (ZPE)= -1086.94271  
Internal Energy (U)= -1086.91947  
Enthalpy (H)= -1086.91853  
Gibbs Free Energy (G)= -1086.99564  
C, 0.1252677675, 1.558620212, -0.2120663422  
C, 1.1695893208, 2.6651558864, 0.0565644312  
C, 0.4619260595, 0.9364040788, -1.5756285682  
C, 2.5661006018, 2.1275322833, 0.0970648184  
H, 1.0960558524, 3.4155821584, -0.7335303747  
H, 0.9086016034, 3.1445553827, 1.004756598  
N, 0.0717115656, 0.6192738582, 0.8818249246  
H, -0.8627372551, 2.0190458062, -0.3193406404  
O, 0.7873454371, -0.3384283254, -1.6540356396  
O, 0.4993669048, 1.6475566662, -2.5706949508  
C, 3.5802492718, 2.3518628995, -0.7986044488  
N, 2.9954933394, 1.2483156052, 1.0772148434  
C, -1.0881567015, 0.2233427387, 1.4583868349  
H, 0.9615098574, 0.3255639823, 1.2724710309  
H, 0.4328886328, -0.9095483293, -0.89317759  
H, 4.642427217, 1.6051780527, -0.3508800472  
N, 3.6348001542, 2.9639071632, -1.6860778992  
C, 4.2461521817, 0.9615696364, 0.7696959108  
C, -1.2081037528, -0.7656955883, 2.3941141373  
H, -1.9798943088, 0.7196654641, 1.0798419283  
H, 5.5592172928, 1.5466504849, -0.7763505233  
H, 4.9011076768, 0.3030252654, 1.3216136517

C, -2.5397263663, -1.0263325148, 3.0436035302  
 C, -0.0036295806, -1.3993642205, 3.0363106603  
 H, -2.5110057142, -0.756968805, 4.1066197443  
 H, -2.7990371603, -2.0924209683, 2.9936448601  
 H, -3.343370216, -0.4525656334, 2.5724710685  
 H, 0.8247389419, -1.531870809, 2.332315918  
 H, 0.3598827611, -0.7860346336, 3.8704966417  
 H, -0.261668729, -2.3841137671, 3.4404329586  
 O, -1.9659239723, -0.6268989103, -1.1364716394  
 C, -2.4031245342, -1.6449751384, -0.2955876613  
 C, -3.0231759106, 0.109981424, -1.7397937372  
 C, -1.1972582167, -2.1574638777, 0.4905283363  
 O, -2.9937850722, -2.7165104986, -1.0050539064  
 H, -3.1913000549, -1.2998432696, 0.3838340409  
 H, -3.6347630071, -0.531759907, -2.3824617813  
 H, -3.6562121763, 0.569754696, -0.9708374307  
 H, -2.5560101621, 0.8885641008, -2.3453645234  
 O, -0.041331886, -2.0929773755, 0.0300551621  
 H, -1.4424407251, -2.9013933511, 1.2619009058  
 C, -2.1576121981, -3.3207253368, -1.995014326  
 H, -1.7291486488, -2.5649821705, -2.6599153097  
 H, -1.353095951, -3.902363027, -1.5327283227  
 H, -2.7994391395, -3.9888533882, -2.5698262736

Table 2 Entry 2 Type d TS

SCF Energy= -1087.31521255  
 Zero-point correction (ZPE)= -1086.93753  
 Internal Energy (U)= -1086.91459  
 Enthalpy (H)= -1086.91365  
 Gibbs Free Energy (G)= -1086.99114  
 C, 2.1109639998, -1.8726729251, 0.2642813541  
 C, 3.2847699834, -1.0959400784, -0.3739171487  
 C, 2.0063860733, -1.4581903133, 1.7360694228  
 C, 2.9612375646, 0.3554368472, -0.5381658159  
 H, 4.1640937845, -1.2284171486, 0.2606570976  
 H, 3.4986885304, -1.5437394844, -1.3484678191  
 N, 0.9087923847, -1.6541776515, -0.5165415122  
 H, 2.3589299949, -2.93841153, 0.2770397983  
 O, 1.1131194563, -0.5747747261, 2.1048743599  
 O, 2.7919562177, -1.9394473428, 2.5453852892  
 C, 3.1710825604, 1.385348417, 0.3436495214  
 N, 2.2506602079, 0.8143633276, -1.6326859549  
 C, -0.2835464107, -2.1961955738, -0.2227374364  
 H, 0.9538496944, -0.9256151218, -1.2251670893  
 H, 0.5218482599, -0.1325736147, 1.3514051377  
 N, 2.5772348444, 2.4843458024, -0.226146097  
 H, 3.6737239018, 1.4265444595, 1.2983323541

C, 2.0366214609, 2.0955595322, -1.4029674847  
 C, -1.4641136063, -1.8586314318, -0.8445987078  
 H, -0.2863035903, -2.8947996768, 0.6139674377  
 H, 2.5545293843, 3.4218080659, 0.1564191012  
 H, 1.5087247172, 2.779679322, -2.051694143  
 C, -2.6792616093, -2.7017816371, -0.5526257345  
 C, -1.4382370838, -1.1031831377, -2.1513519058  
 H, -3.5962572192, -2.1036398477, -0.5149610325  
 H, -2.8252933218, -3.4474359372, -1.344405551  
 H, -2.5798751931, -3.2325546693, 0.3988933843  
 H, -0.780201376, -0.2273183569, -2.1189305911  
 H, -1.089218809, -1.7550493354, -2.9628252289  
 H, -2.4397142139, -0.7512723668, -2.4192046243  
 C, -1.5364154543, -0.0681175089, 0.6039174407  
 C, -2.7805980891, 0.5951778253, 0.007748553  
 O, -0.4267537681, 0.5245302655, 0.5261341401  
 H, -1.7548911371, -0.7302323849, 1.4520024295  
 O, -3.5658114785, 1.1090103571, 1.0661288224  
 O, -2.3669482194, 1.585388157, -0.8801581463  
 H, -3.4417447609, -0.1226015096, -0.487528458  
 C, -2.9357265841, 2.1315976275, 1.8403524995  
 C, -3.4524434543, 2.17780056, -1.5879461719  
 H, -2.6077190757, 2.9597865412, 1.2054785379  
 H, -2.079910806, 1.736535896, 2.3988141637  
 H, -3.6881205128, 2.4894491525, 2.5433081312  
 H, -4.097819411, 2.7469693855, -0.9110235281  
 H, -4.0450984777, 1.4066849806, -2.0949359075  
 H, -3.0163324086, 2.8502746888, -2.3269623873

Table 2 Entry 3 Type a TS

SCF Energy= -1046.85799954  
 Zero-point correction (ZPE)= -1046.53152  
 Internal Energy (U)= -1046.51020  
 Enthalpy (H)= -1046.50925  
 Gibbs Free Energy (G)= -1046.58207  
 C, -1.0476945982, -1.5544562531, -0.5740833962  
 C, -2.1695170407, -1.8828639559, 0.1322046162  
 C, -3.4531140226, -2.1984324825, -0.5839068849  
 O, 3.6841580785, -1.8064289779, -0.7677993236  
 C, -2.3454111354, 0.5395475086, 0.6673060504  
 O, -1.4036703288, 0.8173028344, 1.4058890722  
 H, -1.1154399447, -1.3928590968, -1.6507854789  
 H, 1.2735228038, -2.0122193978, -1.7166149235  
 H, 2.3382775601, 0.0396868048, -2.2882648423  
 H, -4.2967687749, -1.6457496593, -0.1510593143  
 H, -3.3948421706, -1.9587830829, -1.6496013248  
 H, -3.6889168318, -3.2657468539, -0.4841318196

N, 0.1897409525, -1.3615307473, -0.043199613  
 C, 1.5612985703, 0.1028358306, -1.5233670042  
 C, 1.3676522421, -1.29379245, -0.8941425367  
 C, 2.6296967984, -1.6685612683, -0.0929645331  
 O, 2.5269291195, -1.7776507243, 1.1568789896  
 H, 0.3757773687, -1.6744077855, 0.9039141734  
 H, 0.627581333, 0.4040823805, -2.0074439931  
 C, 1.9828318076, 1.1220039132, -0.5209863194  
 C, 3.2014493027, 1.7034378778, -0.320484421  
 N, 1.1616688388, 1.6010973442, 0.4829491273  
 H, 4.1263844413, 1.6062325887, -0.866262447  
 C, 1.8402061436, 2.4374882786, 1.2596268525  
 H, 0.1745602994, 1.3397341275, 0.6328359988  
 H, 3.8150988471, 3.0883442608, 1.1902781633  
 H, 1.4552872796, 2.9645959553, 2.119274946  
 N, 3.0814951976, 2.5136909579, 0.7873373039  
 C, -2.0931076892, -2.2410765347, 1.5918216567  
 H, -1.3792308036, -1.6163828064, 2.1399964704  
 H, -3.0731071735, -2.1274872364, 2.0666907631  
 H, -1.7845891296, -3.2869559328, 1.7185304319  
 H, -3.3005520639, 0.1460503203, 1.0371629974  
 C, -2.3053976894, 1.0133642633, -0.77269053  
 O, -1.3337420278, 1.5656516323, -1.251865085  
 O, -3.4432274361, 0.7812543302, -1.4084676659  
 C, -3.4686351098, 1.1215185702, -2.8068012516  
 H, -4.456351331, 0.8327373349, -3.1592100491  
 H, -3.3135654367, 2.1944619806, -2.9313091992  
 H, -2.6921705563, 0.5624856711, -3.333710807

Table 2 Entry 3 Type c TS

SCF Energy= -1046.85517532  
 Zero-point correction (ZPE)= -1046.52946  
 Internal Energy (U)= -1046.50825  
 Enthalpy (H)= -1046.50731  
 Gibbs Free Energy (G)= -1046.58000  
 H, 0.2783768353, -1.2283233031, -0.7978009829  
 C, 2.5955477097, -0.0691466887, -0.9521066635  
 C, 1.5917663148, -0.4508428369, -1.5675765948  
 C, 1.9714041965, 1.9453408642, 0.180473505  
 C, 1.1836297706, 1.1009156581, 0.9182936923  
 N, -0.0174375625, 0.6189960517, 0.5226281172  
 C, -0.782346675, -0.3213917167, 1.3112583939  
 C, -2.2131458124, 0.1987306329, 1.5708803002  
 C, -0.9021317683, -1.7115794894, 0.6733912417  
 O, -0.3768968019, -1.9253817485, -0.5207876492  
 O, -1.5247833647, -2.5962278561, 1.2383432886  
 H, -0.2709636365, -0.4677920354, 2.2686437626

H, -2.7153248506, -0.4868766612, 2.2566785694  
 H, -2.1283465227, 1.1723476373, 2.0624819467  
 H, -0.5164436046, 1.0745787925, -0.2379140599  
 C, -3.0028816777, 0.3060631877, 0.3045297552  
 C, -4.0564061827, -0.4722635754, -0.1023860711  
 N, -2.6879697662, 1.2211545732, -0.6855490196  
 H, -4.5803289021, -1.2849793485, 0.3774374917  
 C, -3.5452421105, 0.9927329212, -1.6622641722  
 H, -3.5977989336, 1.5265416756, -2.6001903892  
 N, -4.3897069656, -0.0169017738, -1.3545672671  
 H, 1.54324074, 0.7183885278, 1.8732664574  
 H, 3.3339045941, 0.6127532963, -1.3927725368  
 H, -5.1392506267, -0.3633791313, -1.9406867198  
 C, 1.4569594052, 2.6041103019, -1.0697194108  
 H, 0.8505781924, 1.9274162607, -1.6816789097  
 H, 0.833848575, 3.4715869722, -0.8176012329  
 C, 2.2900511533, 2.9610889391, -1.6831813499  
 H, 3.239211657, 2.4917614917, 0.7739643  
 H, 4.0732607965, 2.3927983338, 0.068167402  
 H, 3.1303673213, 3.5612769759, 0.9920437073  
 H, 3.5060121422, 1.9788739267, 1.7020043796  
 C, 3.0803430117, -0.7885895461, 0.2894675665  
 O, 4.1757732165, -0.5929859835, 0.7839623758  
 O, 2.1776388238, -1.6406016575, 0.7551696796  
 C, 2.4764460801, -2.2725149649, 2.0113834264  
 H, 1.6113336601, -2.8944216402, 2.2356118553  
 H, 3.3751576898, -2.8847865083, 1.9187822913  
 H, 2.6142015584, -1.5102610353, 2.7819796937

Table 2 Entry 4 TS type a

SCF Energy= -1295.80749069  
 Zero-point correction (ZPE)= -1295.46730  
 Internal Energy (U)= -1295.44632  
 Enthalpy (H)= -1295.44538  
 Gibbs Free Energy (G)= -1295.51683  
 C, -0.9988844854, -1.6385804734, -0.5855200427  
 C, -2.1255467206, -1.8689296504, 0.180329824  
 C, -3.4442079153, -2.0812461642, -0.518401383  
 O, 3.7682690715, -1.5571662053, -0.9027721754  
 C, -2.1720764519, 0.2017199581, 0.7927152644  
 O, -1.153044806, 0.4093901948, 1.5214547056  
 H, -1.1155595429, -1.3887212976, -1.6401914998  
 H, 1.3593917365, -1.9999007295, -1.8579789061  
 H, 2.1776109018, 0.1673323565, -2.3188072566  
 H, -4.2494645473, -1.5318078648, -0.0124914876  
 H, -3.4116174442, -1.7584134114, -1.5630418255  
 H, -3.7223950662, -3.1420484272, -0.5019927222

N, 0.2573543168, -1.6008981628, -0.1301780324  
 C, 1.440208104, 0.1107397444, -1.5152191194  
 C, 1.4046860324, -1.3369000175, -0.986921333  
 C, 2.7090812731, -1.6563463641, -0.2300227368  
 O, 2.6243525957, -1.966512312, 0.9866575035  
 H, 0.4782967643, -1.8768077405, 0.8216313134  
 H, 0.4639327304, 0.3508785928, -1.9503942207  
 C, 1.8158775008, 1.1239864751, -0.4857926899  
 C, 2.9065697159, 1.94476339, -0.4403038939  
 N, 1.0730051337, 1.3913787023, 0.6489059956  
 H, 3.7352975547, 2.0566802678, -1.1213213355  
 C, 1.6749277712, 2.3441290649, 1.3487994437  
 H, 0.1238655132, 0.9509421747, 0.9337264665  
 H, 3.4426256525, 3.4015465362, 1.0312076583  
 H, 1.3282150739, 2.7659218935, 2.2800969888  
 N, 2.7909415476, 2.693661189, 0.7095029861  
 C, -2.0070180888, -2.4738534135, 1.5563904525  
 H, -1.1955460681, -2.0336779731, 2.1430699988  
 H, -2.9384302374, -2.3254116829, 2.1136075584  
 H, -1.8293434903, -3.5541072134, 1.4863033266  
 C, -2.3601792924, 0.9888232933, -0.4829676274  
 H, -1.410688334, 1.1215618716, -1.0115592646  
 H, -3.0815228796, 0.5033206686, -1.1441981434  
 H, -3.108979849, -0.0918969822, 1.2896629462  
 S, -3.0664468035, 2.6292854826, -0.1030118501  
 C, -1.6224842646, 3.4513375538, 0.6256941428  
 H, -0.7867256069, 3.4486786846, -0.0787005246  
 H, -1.9143075053, 4.4845580768, 0.8270078993  
 H, -1.3278555504, 2.9751776844, 1.563175516

Table 2 Entry 4 TS type b

SCF Energy= -1295.80192088  
 Zero-point correction (ZPE)= -1295.46270  
 Internal Energy (U)= -1295.44147  
 Enthalpy (H)= -1295.44052  
 Gibbs Free Energy (G)= -1295.51406  
 C, -0.6110901315, -1.8200749261, -0.4394807796  
 C, -1.8173163236, -1.871768168, 0.2383536283  
 C, -2.9700496368, -2.5504204171, -0.4639032045  
 O, 4.1302414394, -1.5045219914, -0.4497759184  
 C, -1.9090236309, 0.3083282782, -0.087812261  
 O, -1.2129993829, 0.791499514, 0.8644686371  
 H, -0.6070240507, -1.9677141156, -1.5198360942  
 H, 1.8268134165, -2.1803939279, -1.4493079672  
 H, 2.5481107881, -0.0788672199, -2.272693875  
 H, -3.9304738643, -2.2301530517, -0.0493334848  
 H, -2.9686211154, -2.3459894776, -1.5396940505

H, -2.9115929925, -3.6377768924, -0.3272523744  
 N, 0.5813828603, -1.5410903498, 0.0910845155  
 C, 1.7652468147, -0.0354486747, -1.5120088435  
 C, 1.7745001998, -1.3643321284, -0.722256872  
 C, 3.0332456074, -1.418845093, 0.1618970686  
 O, 2.877570624, -1.3294368906, 1.4077171054  
 H, 0.6991216161, -1.4117258579, 1.0915370868  
 H, 0.8012982287, 0.0599638842, -2.0240351536  
 C, 2.0213504554, 1.1541276231, -0.6509763418  
 C, 3.1359077111, 1.9374633282, -0.5579207328  
 N, 1.121148524, 1.6252561266, 0.285515367  
 H, 4.0664350398, 1.9126876769, -1.1025295442  
 C, 1.6624873344, 2.6553318399, 0.9220196464  
 H, 0.1158372982, 1.2221451219, 0.506812957  
 H, 3.5154689447, 3.595399035, 0.7386715874  
 H, 1.1990128404, 3.2303409449, 1.7092951643  
 N, 2.8835730174, 2.8649297608, 0.4284584231  
 C, -1.8348547742, -1.920542129, 1.7421457918  
 H, -1.1513028938, -1.1941968024, 2.1912901648  
 H, -2.8410380405, -1.712245492, 2.1203894353  
 H, -1.5481768668, -2.9193267598, 2.0961279779  
 C, -3.4090061719, 0.4349338706, -0.0326992127  
 H, -3.8877218072, -0.1853277711, -0.7906450333  
 H, -3.8001952269, 0.18331621, 0.9582847237  
 H, -1.4945569324, 0.3451620822, -1.1059401172  
 S, -3.8885611103, 2.1461998337, -0.4588365768  
 C, -3.3663368928, 3.0403759352, 1.0303030086  
 H, -3.7908516955, 4.0442619272, 0.9607269021  
 H, -3.7576841919, 2.5487685018, 1.9239934512  
 H, -2.2797388878, 3.1132173224, 1.092859355

Table 2 Entry 4 TS type c

SCF Energy= -1295.80542544  
 Zero-point correction (ZPE)= -1295.46585  
 Internal Energy (U)= -1295.44505  
 Enthalpy (H)= -1295.44411  
 Gibbs Free Energy (G)= -1295.51585  
 H, 0.1790986962, -0.9375492658, -0.5666871679  
 C, 2.0662555557, 0.2486543233, -0.9397370793  
 O, 0.9100931478, -0.0605713663, -1.3704213909  
 C, 1.8058050892, 1.9722048623, 0.409471241  
 C, 1.0241713314, 1.1539573396, 1.1941125049  
 N, -0.2707556994, 0.8912149325, 0.955574716  
 C, -1.0259212258, -0.1270319092, 1.6540425975  
 C, -2.5257976396, 0.2342019737, 1.6430389369  
 C, -0.8881196943, -1.547167161, 1.0852300793  
 O, -0.3158647998, -1.7451021624, -0.0715688735

O, -1.3676212782, -2.4816200743, 1.7225386266  
H, -0.6747395773, -0.1764063543, 2.689358961  
H, -3.0574966897, -0.4769455206, 2.2785994361  
H, -2.6350135299, 1.2312422598, 2.0805288557  
H, -0.7384006815, 1.342049203, 0.1721118711  
C, -3.0938890478, 0.19197399, 0.2595377914  
C, -3.9372071976, -0.7448834611, -0.2801232002  
N, -2.7380479506, 1.1144198759, -0.7089507804  
H, -4.4196228041, -1.6115308506, 0.1458366801  
C, -3.363686489, 0.7323586831, -1.8059467904  
H, -3.3195778336, 1.2240331528, -2.767074148  
N, -4.1004344545, -0.3809047674, -1.5945273405  
H, 1.4642641548, 0.6094760175, 2.0289160787  
H, 2.6538659982, 0.9644977691, -1.5304363877  
H, -4.6697314688, -0.8546743519, -2.2849281229  
C, 1.1805583814, 2.8968395134, -0.6046246921  
H, 0.399974844, 2.4093103655, -1.1975141112  
H, 0.7328199032, 3.7667995664, -0.1082670002  
H, 1.9441304421, 3.2669084952, -1.2965003749  
C, 3.1932719079, 2.3359797083, 0.8662355613  
H, 3.9130228359, 2.2315040373, 0.0436020685  
H, 3.2259262317, 3.3840319805, 1.1878003785  
H, 3.5288881129, 1.7139837465, 1.7008221067  
C, 2.8812947465, -0.7425155542, -0.1467428701  
H, 3.6626553753, -0.2379185982, 0.4248870364  
H, 2.255927122, -1.3346367768, 0.5278480979  
S, 3.753488242, -1.858831026, -1.2985725909  
C, 2.3772175938, -2.9013249207, -1.8538961285  
H, 2.8033197007, -3.6599888964, -2.5140481759  
H, 1.905229594, -3.3952589761, -1.001688992  
H, 1.6369424348, -2.3214780223, -2.407983638

Table 2 Entry 4 TS type d

SCF Energy= -1295.80178545

Zero-point correction (ZPE)= -1295.46340

Internal Energy (U)= -1295.44210

Enthalpy (H)= -1295.44115

Gibbs Free Energy (G)= -1295.51530

H, 0.2265188794, 0.1704502324, 1.1886036142  
C, -1.8186357374, -0.0057336571, 0.6353182117  
O, -0.7669010021, 0.7019679789, 0.4895078638  
C, -1.7120165989, -1.6313602455, -0.9159528845  
C, -0.4879476202, -1.95661238, -0.3696037  
N, 0.6613319243, -1.3400039496, -0.6789965539  
C, 1.8985524164, -1.5329062093, 0.0549827193  
C, 3.0380484363, -0.7690745176, -0.6527675313  
C, 1.8579707178, -1.0767974902, 1.5200179029

O, 0.9484502518, -0.2318549109, 1.9133640049  
O, 2.7222161117, -1.4983168113, 2.2868939313  
H, 2.1450049804, -2.5984843532, 0.0785813324  
H, 3.9620642161, -0.9464908004, -0.0979471698  
H, 3.1577001904, -1.1883013208, -1.6559652436  
H, 0.6355061893, -0.5544233135, -1.3264810431  
C, 2.7517995732, 0.6971638472, -0.7288071142  
C, 3.1578638831, 1.6861675062, 0.1302759876  
N, 1.8905948278, 1.22309502, -1.6750988543  
H, 3.815724083, 1.6728569893, 0.9861015985  
C, 1.7818120398, 2.5043963629, -1.3790182646  
H, 1.1883047797, 3.2324062363, -1.9127984289  
N, 2.5305616035, 2.8286561873, -0.3008283311  
H, -0.4193775442, -2.7107141061, 0.4142253131  
H, 2.6212465721, 3.7531633086, 0.1025689034  
C, -1.7655606366, -0.7902941069, -2.1680990624  
H, -1.2189501563, 0.1548401833, -2.0609585918  
H, -1.3261741744, -1.3309538103, -3.0163424459  
H, -2.8001191575, -0.5495864663, -2.4269644655  
C, -2.8636475327, -2.5709067731, -0.6590065996  
H, -3.8256843865, -2.0523034454, -0.7002149323  
H, -2.8974240236, -3.3558975514, -1.4249242766  
H, -2.7741169483, -3.0570106165, 0.3174265654  
C, -3.1276259557, 0.5801555968, 0.1871205085  
H, -3.0111686101, 1.1394059155, -0.7444571233  
H, -3.899587519, -0.1814412129, 0.0745637561  
H, -1.8740226793, -0.7071178811, 1.4768886873  
S, -3.7504181315, 1.7050050862, 1.4862275028  
C, -2.5856710741, 3.0858215944, 1.328269604  
H, -2.5250501368, 3.4142784563, 0.2880658105  
H, -2.9819794378, 3.9016835981, 1.936409582  
H, -1.5932417733, 2.8169027396, 1.6920089369

TS-6a

SCF Energy= -976.242564688

Zero-point correction (ZPE)= -975.84766

Internal Energy (U)= -975.82560

Enthalpy (H)= -975.82465

Gibbs Free Energy (G)= -975.89850

C, 1.2184590494, -1.5942407244, 0.4657612117  
C, 2.3361663256, -1.7692619633, -0.3291826348  
C, 3.6692542674, -1.9883746024, 0.339875494  
O, -3.5476655334, -1.5399387054, 0.8371548517  
C, 2.3260635961, 0.3103730305, -0.8506320453  
O, 1.2883802422, 0.5098101534, -1.5654075157  
H, 1.349188897, -1.3812880383, 1.5269456753  
H, -1.1414746869, -2.0299173063, 1.7482072371

H, -1.9280524955, 0.1146256007, 2.3169732088  
H, 4.4582919419, -1.4130690001, -0.1628016895  
H, 3.6506570878, -1.6979292389, 1.3939563237  
H, 3.9595271588, -3.0446968691, 0.2854419699  
N, -0.0444353996, -1.5668557819, 0.0330155479  
C, -1.2027338541, 0.0942683749, 1.5004932796  
C, -1.1838657397, -1.3285901288, 0.9079076351  
C, -2.4972395057, -1.592380315, 0.1456699915  
O, -2.4280549253, -1.8104498244, -1.0917669421  
H, -0.2715482, -1.7896370974, -0.9313009437  
H, -0.2196622102, 0.3120963969, 1.9312975959  
C, -1.5909383604, 1.1552845765, 0.5258124488  
C, -2.6943951727, 1.9603563557, 0.5289463875  
N, -0.8520127463, 1.4959836887, -0.5918842954  
H, -3.5230347155, 2.0205594008, 1.2165355346  
C, -1.4706849338, 2.4769016994, -1.2346601575  
H, 0.1003929403, 1.0532896231, -0.9355581761  
H, -3.2542033016, 3.4908171691, -0.8553405454  
H, -1.1340049651, 2.9537239951, -2.1428611806  
N, -2.5915681808, 2.7754995012, -0.575856336  
C, 2.2036983011, -2.332037836, -1.7222423771  
H, 1.3746513232, -1.8865256182, -2.2793566  
H, 3.1225011957, -2.1506475846, -2.2907472756  
H, 2.0446726331, -3.4169384446, -1.6862152361  
C, 2.5326783081, 1.0879682338, 0.4289914721  
C, 3.2523029474, 0.5575346107, 1.0613163245  
H, 3.2542984052, 0.050573935, -1.3834392861  
C, 3.0724478548, 2.5048164771, 0.1478698966  
H, 3.9405959382, 2.4077558874, -0.5199160172  
H, 1.5843567825, 1.1646008366, 0.9774696037  
C, 3.5445092265, 3.1362667322, 1.4579466499  
H, 4.3273040667, 2.5348099126, 1.9311478027  
H, 3.9429986245, 4.1415046426, 1.2860132254  
H, 2.7085238372, 3.2210185177, 2.1631899276  
C, 2.0342556652, 3.403205908, -0.5253222933  
H, 1.6986404563, 3.0010730761, -1.4854274347  
H, 1.153520992, 3.5163940047, 0.120081313  
H, 2.4504569926, 4.4002960586, -0.7040097155

TS-6b

SCF Energy= -976.238882736  
Zero-point correction (ZPE)= -975.84423  
Internal Energy (U)= -975.82214  
Enthalpy (H)= -975.82119  
Gibbs Free Energy (G)= -975.89532  
C, -0.7285311999, -1.7456402298, -0.5022814438  
C, -1.9972719901, -1.5979367086, 0.027055865

C, -3.1411382516, -2.2286269201, -0.7293264496  
O, 3.9988935691, -1.8776719175, 0.0200809228  
C, -1.8255574739, 0.5323997841, -0.5696526779  
O, -1.1811903442, 1.0743868969, 0.3902114124  
H, -0.6243060355, -2.0167095461, -1.5531203724  
H, 1.7522848782, -2.4634804581, -1.1690572223  
H, 2.7912843883, -0.5502974269, -2.107563937  
H, -4.0877457799, -1.7286937259, -0.5041064891  
H, -2.9788734877, -2.1968903194, -1.8116731155  
H, -3.2574321707, -3.2802728691, -0.4371625915  
N, 0.4249623387, -1.5285190716, 0.1361738051  
C, 1.9404498133, -0.3433159812, -1.4545403197  
C, 1.7116211916, -1.568474828, -0.5402250315  
C, 2.8528329104, -1.6511667661, 0.4898757025  
O, 2.5690218151, -1.4507303407, 1.6994571305  
H, 0.448503377, -1.323223488, 1.1301061763  
H, 1.0558532752, -0.2075621314, -2.086618476  
C, 2.2320373905, 0.9012988091, -0.6876071256  
C, 3.4204274258, 1.5461394574, -0.4944389466  
N, 1.2804451063, 1.5833691729, 0.0464461731  
H, 4.4067492053, 1.3440293532, -0.8809563683  
C, 1.8633299086, 2.6051979265, 0.6587934249  
H, 0.2059118134, 1.3185326344, 0.1629409319  
H, 3.8343698133, 3.2875497774, 0.6764712991  
H, 1.3769694528, 3.3229061974, 1.3014994628  
N, 3.160206109, 2.6055436834, 0.3459558465  
C, -2.1847117847, -1.4425492676, 1.5117087166  
H, -1.4800300153, -0.7265449092, 1.9458875674  
H, -3.1982729436, -1.0937513679, 1.7355048444  
H, -2.0463440545, -2.4050384134, 2.0210688022  
C, -3.2998114596, 0.8193678294, -0.7024336628  
H, -3.7195067381, 0.2360118954, -1.5287370314  
H, -1.290526335, 0.373808024, -1.5167135032  
C, -3.5296610251, 2.3188784729, -0.9818526029  
H, -3.1386390804, 2.8807662703, -0.1237282186  
H, -3.8202369823, 0.5426683422, 0.2224838946  
C, -5.0277082159, 2.5906574041, -1.1001370761  
H, -5.2196362581, 3.6587275656, -1.2466825261  
H, -5.4490820723, 2.0509396018, -1.9568000294  
H, -5.5630494428, 2.2692293251, -0.2005397645  
C, -2.7964317376, 2.7815597452, -2.2414943068  
H, -1.7092501724, 2.6925460683, -2.1424184541  
H, -3.1084464422, 2.1853501882, -3.1079725446  
H, -3.0248464182, 3.8308029415, -2.4548048707

TS-6c

SCF Energy= -976.241350874

Zero-point correction (ZPE)= -975.84650  
Internal Energy (U)= -975.82464  
Enthalpy (H)= -975.82370  
Gibbs Free Energy (G)= -975.89735  
H, -0.1184625628, -0.4072706608, 1.0320091725  
C, 1.8668775273, 0.3876078289, 0.424480105  
O, 0.9772163937, -0.4965829205, 0.2064171202  
C, 1.3461178463, 2.1332198094, -0.8595336349  
C, 0.1922538268, 2.2174884686, -0.119035296  
N, -0.9102163242, 1.4726828266, -0.3202270409  
C, -2.0112783757, 1.4218447374, 0.6184487104  
C, -3.3083504173, 1.0146749917, -0.1103914546  
C, -1.8298745963, 0.4583167546, 1.8021554508  
O, -0.8881766041, -0.4447580846, 1.7856816262  
O, -2.6264119744, 0.5278985074, 2.7360715224  
H, -2.1441256789, 2.4164463858, 1.0548020946  
H, -4.142174507, 1.1178892934, 0.5873137227  
H, -3.4670549764, 1.7150429243, -0.9358990877  
H, -0.9353472964, 0.8036710821, -1.0859224456  
C, -3.2468604544, -0.3946609597, -0.6081703294  
C, -3.8798675191, -1.4965547444, -0.0927486057  
N, -2.4240628978, -0.773694335, -1.65414172  
H, -4.5833309644, -1.6099163164, 0.7180904696  
C, -2.5708812511, -2.0810084428, -1.7615382064  
H, -2.0769495771, -2.7191853996, -2.4798876857  
N, -3.4388146972, -2.5594386838, -0.8421024411  
H, 0.1503811761, 2.875992902, 0.7471148162  
H, -3.7135781726, -3.5277012312, -0.7323227134  
C, 1.3768123223, 1.4016364178, -2.1768158885  
H, 0.8141392872, 0.4626902657, -2.1546380561  
H, 0.9557549076, 2.0274751162, -2.9733999547  
H, 2.4097231461, 1.16516065, -2.4530970533  
C, 2.4523033716, 3.1258983578, -0.6218851169  
H, 3.4227017975, 2.6168035215, -0.5493509691  
H, 2.5238677016, 3.8320812222, -1.458035603  
H, 2.2942669285, 3.6993150823, 0.2958448783  
H, 2.7456057581, 0.3792809091, -0.2332191483  
C, 2.0684281042, 0.9322605247, 1.8173072187  
C, 2.7218275746, -0.1309769622, 2.7236289333  
H, 1.1024821356, 1.2174999529, 2.2478304732  
C, 2.8266972226, 0.4087375616, 4.1481441053  
H, 1.8427830694, 0.6807889963, 4.5442932048  
H, 3.267324697, -0.3390230428, 4.8156479904  
H, 3.4631116031, 1.3015614069, 4.1749069274  
H, 2.7103230592, 1.8200943366, 1.7804708742  
H, 2.0627402052, -1.0097749663, 2.7314480699  
C, 4.09490791, -0.5544719842, 2.2022600524

H, 4.7539285902, 0.3180819989, 2.1112323477  
H, 4.5666418092, -1.2623043712, 2.8913212625  
H, 4.0342360661, -1.0370120875, 1.2212820125

TS-6d  
SCF Energy= -976.238186613  
Zero-point correction (ZPE)= -975.84466  
Internal Energy (U)= -975.82256  
Enthalpy (H)= -975.82161  
Gibbs Free Energy (G)= -975.89645  
H, -0.0764430366, -0.4158719843, 1.2948174361  
C, -2.1207885527, -0.2258048098, 0.7171507192  
O, -1.0146530905, 0.3764467151, 0.9300950139  
C, -2.0066220422, -0.9445195286, -1.4381345037  
C, -0.8570068309, -1.6037934675, -1.0663591752  
N, 0.360814589, -1.044430381, -1.0034521735  
C, 1.5140891621, -1.7127582905, -0.4351499473  
C, 2.8044003984, -1.0181007923, -0.9114066532  
C, 1.5347447212, -1.7748894299, 1.1000779731  
O, 0.6835793511, -1.0811449862, 1.7925611835  
O, 2.3897157251, -2.4813312814, 1.6379402939  
H, 1.5239261659, -2.7525439161, -0.7771574362  
H, 3.6571572279, -1.5686480419, -0.5087922324  
H, 2.843043601, -1.0823314138, -2.0027145747  
H, 0.4777559293, -0.0651367381, -1.2547328182  
C, 2.8634614872, 0.4095974385, -0.4682031132  
C, 3.5416957465, 0.9384802343, 0.6002809226  
N, 2.1212012434, 1.3997299825, -1.088016351  
H, 4.2138510337, 0.4956912843, 1.3196971896  
C, 2.3592521787, 2.5006918905, -0.4005895458  
H, 1.9467520947, 3.4781153973, -0.6048728413  
N, 3.2095323113, 2.2710198042, 0.6245429086  
H, -0.9064946545, -2.6397925119, -0.7317746168  
H, 3.5530866963, 2.9651571375, 1.276785946  
C, -1.92198127, 0.4026699233, -2.1094478518  
H, -1.2889467444, 1.1054546863, -1.5537664851  
H, -1.5037479997, 0.3090208839, -3.1202482843  
H, -2.9160460114, 0.84902554, -2.2030414887  
C, -3.2299272873, -1.781483674, -1.7113231257  
H, -4.1533975551, -1.2498903352, -1.4616979896  
H, -3.2912363961, -2.0319434792, -2.7781919518  
H, -3.2083542739, -2.7182128106, -1.1457943566  
C, -3.3651819779, 0.6056695286, 0.598190288  
H, -4.0853723964, 0.1503792857, -0.0849062263  
H, -2.2442170709, -1.2429239547, 1.1105217635  
C, -4.0502646613, 0.7584662686, 1.9748435998  
H, -4.3270476364, -0.2454579335, 2.3238154747

C, -5.3290342231, 1.5776143866, 1.8007249565  
H, -5.8656510485, 1.6654566111, 2.7508070978  
H, -5.0890512482, 2.5901518778, 1.4546096669  
H, -6.0010259772, 1.1184167858, 1.0685377181  
C, -3.1366424986, 1.4026821605, 3.0163433145  
H, -2.7801275743, 2.377980316, 2.6625767566  
H, -3.6803387267, 1.5605776271, 3.9534178445  
H, -2.2621823549, 0.7832313758, 3.2368895754  
H, -3.0897564728, 1.5943316094, 0.2113226794

TS-8a (chelated)

SCF Energy= -1012.13244424  
Zero-point correction (ZPE)= -1011.76033  
Internal Energy (U)= -1011.73834  
Enthalpy (H)= -1011.73739  
Gibbs Free Energy (G)= -1011.81155  
C, -1.1315832739, -1.3421782767, -0.7243915134  
C, -2.3305637152, -1.407449933, -0.0446800006  
C, -3.6182918314, -1.3214488566, -0.8224219524  
O, 3.4968961408, -2.5142698665, -0.7630704235  
C, -2.0811870888, 0.5992285162, 0.7661283449  
O, -1.0483687474, 0.6088871564, 1.4941720994  
H, -1.1112949964, -0.9879632508, -1.7558638155  
H, 1.1532754494, -2.1943553712, -1.8813267855  
H, 2.5716491645, -0.3005162162, -2.0786383808  
H, -4.3395595539, -0.6589076424, -0.324265147  
H, -3.458383964, -0.9523400881, -1.8395748485  
H, -4.0890807112, -2.3098270397, -0.8918725344  
N, 0.0639651555, -1.6248926351, -0.1905785016  
C, 1.7610924274, -0.2112267012, -1.3521301241  
C, 1.301708038, -1.6276564593, -0.9554871467  
C, 2.4132767849, -2.3280684521, -0.1499364201  
O, 2.1722724444, -2.6316873425, 1.0476796052  
H, 0.1294050523, -2.0339336821, 0.7363848666  
H, 0.9265634128, 0.3018055482, -1.8368974477  
C, 2.2629007986, 0.5853105443, -0.1964020928  
C, 3.539011817, 0.9619014906, 0.1112065532  
N, 1.4625643461, 1.0363714504, 0.8365152207  
H, 4.466325978, 0.811799067, -0.4183848425  
C, 2.213116681, 1.6631166953, 1.7324509585  
H, 0.4126371943, 0.8919910858, 0.9452692748  
H, 4.260059622, 2.0448911407, 1.8090614339  
H, 1.8640243227, 2.1218400542, 2.6448741844  
N, 3.4770436143, 1.6332976278, 1.3121358167  
C, -2.4056036512, -2.1257371334, 1.2808809789  
H, -1.6013210808, -1.8295764702, 1.9622532177  
H, -3.3580331647, -1.9069205751, 1.7750776695

H, -2.347763153, -3.2123180848, 1.1388728806  
C, -2.1841569843, 1.5422973943, -0.4177032787  
H, -2.8662979398, 1.1247243064, -1.1688512482  
H, -3.0539037868, 0.376293166, 1.2324711102  
O, -0.889237282, 1.6990382663, -0.9743684028  
C, -0.9192182582, 2.0721960381, -2.3434577887  
H, -1.4992932133, 2.98928548, -2.4984668093  
H, 0.1114595282, 2.2539932358, -2.6546809783  
H, -1.3498499947, 1.2669739788, -2.9536245888  
C, -2.7326510768, 2.8798018045, 0.0826527747  
H, -2.0748065268, 3.2909779356, 0.8546934892  
H, -2.8014711203, 3.594892547, -0.7418345159  
H, -3.733791817, 2.7492724171, 0.5033375587

TS-8a (Felkin-Anh)

SCF Energy= -1012.12701427  
Zero-point correction (ZPE)= -1011.75469  
Internal Energy (U)= -1011.73316  
Enthalpy (H)= -1011.73221  
Gibbs Free Energy (G)= -1011.80443  
C, -1.0294788929, -1.8470158685, -0.5893882906  
C, -2.1501557082, -2.1248785355, 0.1720982695  
C, -3.4445452397, -2.4717457156, -0.5200814459  
O, 3.7382547069, -1.3231753285, -0.6468311298  
C, -2.2122327212, -0.0286773673, 0.8272949803  
O, -1.2044247361, 0.1008806851, 1.5816750861  
H, -1.1424739157, -1.6505670443, -1.6554235571  
H, 1.4755696807, -2.1497014077, -1.7085410265  
H, 2.0833552203, 0.0251054912, -2.3602756573  
H, -4.2893678957, -1.9304416736, -0.0751227124  
H, -3.4159151429, -2.2516504218, -1.5903175767  
H, -3.6539840666, -3.5423017923, -0.4024751382  
N, 0.2083287526, -1.7083880967, -0.1046439783  
C, 1.3047402736, -0.0228148662, -1.5956941642  
C, 1.3787000715, -1.4005816466, -0.9147472704  
C, 2.6477864936, -1.4904231336, -0.041810892  
O, 2.5017323399, -1.7014664053, 1.190147697  
H, 0.4047763515, -1.9032658128, 0.8720065584  
H, 0.3423662561, 0.0664181918, -2.1121320023  
C, 1.5077647909, 1.1373556095, -0.6765816893  
C, 2.3763180459, 2.185012334, -0.7967760553  
N, 0.7884411911, 1.3557890641, 0.4846351672  
H, 3.1188975831, 2.4042998315, -1.5475934048  
C, 1.180852348, 2.4978376476, 1.0329951304  
H, -0.0238900597, 0.7713652954, 0.8954422891  
H, 2.6377960884, 3.8813803481, 0.4790344221  
H, 0.7877761965, 2.9332967955, 1.9396854335



N, 2.1483303639, 3.0156374914, 0.2774795525  
C, -2.0157307653, -2.6981934079, 1.5615744156  
H, -1.187104092, -2.2687913249, 2.1288923906  
H, -2.9358123904, -2.523561373, 2.1309307563  
H, -1.8660934387, -3.7832953782, 1.5018355622  
C, -2.3083650152, 0.9033354564, -0.3892463945  
H, -1.4598061976, 0.7153107101, -1.0617506256  
H, -3.1709871406, -0.3423789289, 1.2679648335  
O, -2.1442093678, 2.2131379252, 0.1661656237  
C, -1.6575278447, 3.1647051011, -0.7684576636  
H, -2.3906538162, 3.3697433883, -1.5571425246  
H, -1.4631752023, 4.0854511983, -0.2150351928  
H, -0.7241981155, 2.8140537929, -1.231736337  
C, -3.6206272253, 0.7950048964, -1.1448075472  
H, -4.4653481578, 0.8359796534, -0.449494284  
H, -3.7131487005, 1.6202093132, -1.8557684387  
H, -3.6727299962, -0.1368350115, -1.7101114886

TS-8c (chelated)

SCF Energy= -1012.12674884  
Zero-point correction (ZPE)= -1011.75565  
Internal Energy (U)= -1011.73397  
Enthalpy (H)= -1011.73302  
Gibbs Free Energy (G)= -1011.80646  
H, 0.4114574351, 0.6073419186, 1.2380559376  
C, 2.499818849, -0.4238783678, 1.0548667988  
O, 1.3846316594, -0.3364828763, 1.6527588302  
C, 2.1274709359, -1.9216203656, -0.5651343533  
C, 1.3890762495, -0.9130960206, -1.1429944597  
N, 0.1155705299, -0.6204468851, -0.8244720281  
C, -0.5501747433, 0.5985514095, -1.2208997258  
C, -1.9840486054, 0.2982095189, -1.7115497809  
C, -0.6659647734, 1.6560670413, -0.109524397  
O, -0.3256701134, 1.3602195049, 1.1199295034  
O, -1.1652009167, 2.7439833558, -0.3826623906  
H, 0.0215847438, 1.0550974736, -2.0343232446  
H, -2.4081558758, 1.2140834181, -2.1286430535  
H, -1.9169468597, -0.4415432505, -2.5145978047  
H, -0.4082639637, -1.2397375075, -0.2126281751  
C, -2.8624427137, -0.1891744607, -0.6025755801  
C, -3.8904975593, 0.483495667, 0.006344165  
N, -2.6745275454, -1.4143685674, 0.0141453805  
H, -4.3274487927, 1.4529588596, -0.1796966722  
C, -3.5828010515, -1.4690043635, 0.9706992853  
H, -3.7338316601, -2.2897305443, 1.6569107695  
N, -4.3389937128, -0.3490382034, 1.0024225122  
H, 1.8478088533, -0.2584950989, -1.8808457817

H, 3.2115460294, -1.1932874885, 1.3849932287  
H, -5.1035438249, -0.1662182898, 1.6408420174  
C, 1.479427923, -2.9613084849, 0.3119707391  
H, 0.6721887375, -2.5598512558, 0.9291112173  
H, 1.0671031572, -3.7675600863, -0.3074175488  
H, 2.2236115834, -3.4085277221, 0.9803500476  
C, 3.4428270807, -2.3405470844, -1.169767853  
H, 4.2338445872, -2.3811470265, -0.410459031  
H, 3.34781298, -3.3508226424, -1.5866224173  
H, 3.7637861358, -1.6762250093, -1.9748108715  
C, 3.1475457362, 0.8490256247, 0.5286558218  
H, 3.4074675259, 1.3754291575, 1.4639398683  
O, 2.1827789813, 1.6181133133, -0.1734780151  
C, 2.2603637943, 3.010629596, 0.0954880065  
H, 3.2703696266, 3.3957484727, -0.0889416788  
H, 1.561163627, 3.5073578138, -0.580153352  
H, 1.9765020516, 3.2209571637, 1.1341833419  
C, 4.4112423097, 0.6693664336, -0.2922705666  
H, 4.1774854795, 0.2696905795, -1.2806253746  
H, 4.9020117106, 1.6380852202, -0.419995902  
H, 5.1108748587, -0.0039052106, 0.211788427

TS-8c (Felkin-Anh)

SCF Energy= -1012.12603246  
Zero-point correction (ZPE)= -1011.75487  
Internal Energy (U)= -1011.73292  
Enthalpy (H)= -1011.73198  
Gibbs Free Energy (G)= -1011.80672  
H, -0.0096421606, -1.2420600714, -0.620737143  
C, 2.1436164527, -0.1140090103, -0.9362683551  
O, 1.0412573646, -0.5359539326, -1.3893481153  
C, 1.747836301, 1.75142427, 0.1723579943  
C, 0.9316868986, 1.0056593122, 0.9916485256  
N, -0.3406814345, 0.6933097779, 0.6977730344  
C, -1.1597192089, -0.204183298, 1.4810820483  
C, -2.5600629399, 0.4012022532, 1.7088866364  
C, -1.3384729545, -1.5960362802, 0.8557026621  
O, -0.7474556619, -1.8869935297, -0.2776964587  
O, -2.0617710718, -2.4143144789, 1.4115541361  
H, -0.6708916517, -0.3631182203, 2.4483609295  
H, -3.1154900224, -0.2493856667, 2.3870422031  
H, -2.4298002676, 1.3706717062, 2.1988221967  
H, -0.8040165339, 1.1548485568, -0.0820094838  
C, -3.3195902675, 0.5472145139, 0.427286189  
C, -4.4179957864, -0.1627383336, 0.0154523299  
N, -2.9349233272, 1.4314272228, -0.5667031861  
H, -5.0018391281, -0.9313651664, 0.4986804228

C, -3.7969668921, 1.2527838852, -1.5499624393  
H, -3.8038573582, 1.781592157, -2.492200322  
N, -4.7088003464, 0.303336806, -1.2434309923  
H, 1.3268732009, 0.5656219793, 1.9063080689  
H, 2.7317625931, 0.5688710829, -1.5668398203  
H, -5.4735508655, 0.0016461584, -1.8347913405  
C, 1.1679653878, 2.5301982924, -0.9819017298  
H, 0.4750376426, 1.9344574315, -1.5860888911  
H, 0.6263948064, 3.4125217401, -0.6187038969  
H, 1.9705084444, 2.879358906, -1.6391980319  
C, 3.0910916958, 2.2084249465, 0.6736623997  
H, 3.8756043762, 2.0055179846, -0.0681421649  
H, 3.0835800291, 3.2916756476, 0.8436592317  
H, 3.3679182147, 1.7224049503, 1.6133318719  
C, 3.0169605095, -0.9656593806, -0.0135068239  
H, 3.5243868498, -0.3141739082, 0.7080741131  
O, 4.0087089203, -1.5076945046, -0.8940662158  
C, 5.2470133514, -1.7664221498, -0.2466198402  
H, 5.1311196761, -2.4897178944, 0.5687831473  
H, 5.9206225417, -2.1822510326, -0.9975786815  
H, 5.674023011, -0.8373013803, 0.150727913  
C, 2.2705144555, -2.0800604089, 0.6974387075  
H, 2.9704204855, -2.673757446, 1.2913800055  
H, 1.5092940717, -1.6844939663, 1.3768001349  
H, 1.7834503186, -2.7343537608, -0.030494259

TS-9a

SCF Energy= -1164.73921617  
Zero-point correction (ZPE)= -1164.32682  
Internal Energy (U)= -1164.30286  
Enthalpy (H)= -1164.30191  
Gibbs Free Energy (G)= -1164.37967  
C, -0.5028519011, 0.1461035629, -1.5294891081  
C, 0.3355539711, -0.6503894937, -0.7841497078  
C, 0.5212843954, -2.0938463577, -1.1723361138  
O, -1.6014167314, 4.5669855974, -2.9630658233  
C, -1.1711448828, -0.7474432673, 0.8694339425  
O, -1.3340037853, 0.4142185927, 1.3166852081  
H, -1.1809150859, -0.3113583046, -2.249711074  
H, -1.2380605288, 1.9883511001, -3.3389109378  
H, -3.4791920747, 2.6194584094, -2.8594912371  
H, 0.4810618886, -2.7506490277, -0.2923704522  
H, -0.238270629, -2.427537496, -1.8854882127  
H, 1.5060098761, -2.2407628509, -1.6331611636  
N, -0.6122722567, 1.480189942, -1.4090312923  
C, -2.9364285998, 2.1324121151, -2.0463622789  
C, -1.4259153675, 2.2908492898, -2.3021478539

C, -1.0210323854, 3.7733662596, -2.1765750967  
O, -0.1695988695, 4.0812572324, -1.3021812707  
H, 0.0499099083, 2.003058368, -0.8446350301  
H, -3.1875556595, 1.0670638393, -2.0616463587  
C, -3.3867049979, 2.7446387373, -0.763942607  
C, -4.2152893138, 3.8086320191, -0.5495204221  
N, -2.9896794767, 2.3035597672, 0.4838353439  
H, -4.7368401472, 4.4473688809, -1.2445975147  
C, -3.5616053666, 3.0499729606, 1.419769875  
H, -2.3696281497, 1.472130707, 0.6959014419  
H, -4.8509257918, 4.6824856947, 1.2962691834  
H, -3.4439168923, 2.9338946081, 2.4865130846  
N, -4.3069179809, 3.9738269376, 0.814897983  
C, 1.4356559266, -0.0367416831, 0.0451875513  
H, 1.0941574116, 0.8279470618, 0.6235655818  
H, 1.8331499534, -0.7732078041, 0.7514603352  
H, 2.2660496031, 0.2927040469, -0.5923057699  
H, -0.3907089788, -1.3889479298, 1.3068810137  
C, -2.3334938277, -1.525982308, 0.2899215465  
C, -3.1995191822, -2.1416882772, 1.4277016284  
O, -3.2277447081, -0.6513986446, -0.3812121162  
O, -4.4551750639, -1.4818775544, 1.296183097  
H, -2.808686955, -1.9337099264, 2.4260111798  
H, -3.3074113772, -3.2220788947, 1.2944863107  
C, -4.5568623501, -1.0660087699, -0.0614589442  
C, -5.4910340061, 0.1180514814, -0.1496042362  
C, -4.9819303403, -2.2208304851, -0.9576789675  
H, -5.4510487569, 0.5461605485, -1.1551225141  
H, -6.5150320246, -0.2066371333, 0.0509392759  
H, -5.2077608405, 0.8788292643, 0.5816044558  
H, -5.9694312129, -2.5781885029, -0.6547633876  
H, -5.0327625752, -1.8803778081, -1.9953110889  
H, -4.2733939755, -3.0520134133, -0.8977356299  
H, -1.9720434246, -2.3130998716, -0.3786863284

TS-9b

SCF Energy= -1164.73272429  
Zero-point correction (ZPE)= -1164.31983  
Internal Energy (U)= -1164.29630  
Enthalpy (H)= -1164.29536  
Gibbs Free Energy (G)= -1164.37253  
H, 1.2538138135, 1.670606243, 0.3418634743  
C, 2.0144250434, -0.7177233773, 0.3658823672  
O, 1.6066247032, 0.3110391064, 0.9590789819  
C, 0.2285871394, -1.6380422856, -0.7079317319  
C, 0.0997497935, -0.4305167001, -1.346011768  
N, -0.5097012235, 0.6410442059, -0.7997966757

C, -0.6109989484, 1.9390033432, -1.4269923553  
C, -2.0499270376, 2.4841865773, -1.3085932735  
C, 0.3437027493, 2.9946786604, -0.8487754588  
O, 1.1785181185, 2.6650421431, 0.1128318254  
O, 0.3099679339, 4.1409646723, -1.2748857212  
H, -0.3476585517, 1.8373497933, -2.4853151872  
H, -2.1259989761, 3.4053927651, -1.8893900239  
H, -2.7233826645, 1.744839454, -1.7523257839  
H, -1.0208025015, 0.5331235875, 0.0733573626  
C, -2.4209868565, 2.7605059756, 0.1148347738  
C, -2.6262915769, 3.9764364987, 0.7143950551  
N, -2.5341467579, 1.7509889166, 1.0562679537  
H, -2.615337554, 4.9831249735, 0.3248619573  
C, -2.8082897042, 2.3593239423, 2.1946748117  
H, -2.9681170831, 1.8795480185, 3.1494150205  
N, -2.8769909529, 3.6997259266, 2.0361574709  
H, 0.5531455917, -0.269636259, -2.3237851398  
H, 1.9760247028, -1.6799793939, 0.8994937732  
H, -3.082472404, 4.3731980824, 2.7639164086  
C, -0.5595261149, -1.9270168149, 0.5453673273  
H, -0.4989279262, -1.1139975738, 1.2778479173  
H, -1.6194110901, -2.0854090185, 0.3086458913  
H, -0.1870297438, -2.8367358312, 1.0260005124  
C, 0.7737128381, -2.8294743281, -1.4468112331  
H, 1.5362183715, -3.3456490786, -0.8482294565  
H, -0.0257148969, -3.5553239113, -1.6397981587  
H, 1.2172877666, -2.5487969339, -2.4064054066  
C, 3.0998934881, -0.6776418477, -0.7062682722  
C, 3.2725782489, 0.6442906962, -1.4366460001  
O, 4.3471210222, -0.8043983793, -0.0078603796  
O, 4.0680876094, 1.3962322309, -0.5260801117  
H, 2.3475855541, 1.1894115902, -1.6213488389  
H, 3.7983988442, 0.4927340742, -2.3862373943  
C, 4.9801949728, 0.4879747196, 0.0829358826  
C, 5.1517386831, 0.8801560294, 1.534151801  
C, 6.2884171671, 0.4346674297, -0.6855173325  
H, 5.8320900042, 0.1828107321, 2.0294721565  
H, 5.5746690054, 1.8861524985, 1.5988468396  
H, 4.1822258654, 0.8616345045, 2.0386785404  
H, 6.7996232086, 1.3984094055, -0.6146573368  
H, 6.9362165263, -0.3382150728, -0.2635836489  
H, 6.1005047252, 0.2032600972, -1.7376911987  
H, 3.0039809841, -1.5292256078, -1.3815030471
